1                   **Concomitant chemotherapy increases**  
2                   **radiotherapy-mediated DNA-damage**  
3                   **in peripheral blood lymphocytes**

4 Yvonne Lorat<sup>1\*</sup>, Jochen Fleckenstein<sup>1</sup>, Patric Görlinger<sup>1,#a</sup>, Christian Rube<sup>1</sup>, Claudia E. Rube<sup>1</sup>

5 <sup>1</sup> Department of Radiotherapy and Radiation Oncology, Saarland University, Medical Center,  
6 Homburg/Saar, Germany

7 <sup>#a</sup> Current Address: Department of Anesthesiology, DRK Hospitals Berlin Westend, Berlin, Germany

8 \* Corresponding author. E-mail: [yvonne.lorat@uks.eu](mailto:yvonne.lorat@uks.eu)

9 E-Mail address of all authors:

10 Yvonne Lorat: [yvonne.lorat@uks.eu](mailto:yvonne.lorat@uks.eu)

11 Jochen Fleckenstein: [jochen.fleckenstein@uks.eu](mailto:jochen.fleckenstein@uks.eu)

12 Patric Görlinger: [pgoerlinger@gmail.com](mailto:pgoerlinger@gmail.com)

13 Christian Rube: [christian.ruebe@uks.eu](mailto:christian.ruebe@uks.eu)

14 Claudia Rube: [claudia.ruebe@uks.eu](mailto:claudia.ruebe@uks.eu)

15 Short title:

16 DNA damage accumulation in peripheral blood lymphocytes during cancer therapy

## 17 **Abstract**

18 53BP1-foci detection in peripheral blood lymphocytes (PBLs) by immunofluorescence  
19 microscopy (IFM) is a sensitive and quantifiable DNA-double-strand-break (DSB) marker. In  
20 addition, high-resolution transmission-electron-microscopy (TEM) with immunogold-labeling  
21 of 53BP1 and DSB-bound phosphorylated Ku70 (pKu70) can be used to determine the  
22 progression of the DNA-repair process. Here, we analyzed whether different modes of  
23 irradiation influence the formation of DSBs in the PBLs of patients with cancer, and whether  
24 accompanying chemotherapy influences the DSB-appearance.

25 We obtained 86 blood samples before and 0.1, 0.5 and 24 h after irradiation from patients  
26 with head and neck, or rectal cancers receiving radiotherapy (RT) or radio-chemotherapy  
27 (RCT). 53BP1-foci were quantified by IFM. In addition, TEM was used to quantify gold-  
28 labelled pKu70-dimers and 53BP1-clusters within euchromatin and heterochromatin of PBLs.  
29 During radiotherapy, persisting 53BP1-foci accumulated in PBLs with increasing numbers of  
30 administered RT-fractions. This 53BP1-foci accumulation was not influenced by irradiation  
31 technique applied (3D-conformal radiotherapy versus intensity-modulated radiotherapy),  
32 dose intensity per fraction, number of irradiation fields, or isodose volume. However, more  
33 53BP1-foci were detected in PBLs of patients treated with accompanying chemotherapy.  
34 TEM analyses showed that DSBs, indicated by pKu70, were present for longer periods in  
35 PBLs of RCT-patients than in PBLs of RT-only-patients. Moreover, not every residual 53BP1-  
36 focus was equivalent to a remaining DSB, since pKu70 was not present at every damage  
37 site. Persistent 53BP1-clusters, visualized by TEM, without colocalizing pKu70 likely indicate  
38 chromatin alterations after repair completion, or possibly, defective repair. Therefore, IFM-  
39 53BP1-foci analyses alone are not adequate to determine individual repair capacity after  
40 irradiation of PBLs, as a DSB may be indicated by a 53BP1-focus but not every 53BP1-focus  
41 represents a DSB.

42 The level of DNA-damage during RT is influenced by the presence of accompanying  
43 chemotherapy.

## 44 Introduction

45 The effects of radiotherapy (RT) in cancer treatment can be significantly enhanced by  
46 simultaneous chemotherapy [1]. The action of both seems to depend on their ability to induce  
47 mutagenic and clastogenic DNA damage, including crosslinks, strand-breaks, replication  
48 errors and base adducts [2, 3], which can induce cell death. Precise dose distributions to the  
49 planning target volume (PTV) by highly conformal techniques are critical for minimizing side  
50 effects to adjacent organs at risk.

51 DNA-damage-repair mechanisms protect against adverse effects of carcinogenic therapies.  
52 While the likelihood of RT-induced side effects in organs at risk can be reliably assessed by  
53 dosimetric calculations, peripheral blood lymphocytes (PBL), especially in patients who  
54 received radio-chemotherapy (RCT), are exposed to an erratic amount of events that may  
55 cause DNA damage. Double-strand-break (DSB) repair is crucial for PBL survival following  
56 RT or RCT-induced DNA damaging effects. During non-homologous end joining (NHEJ), the  
57 major mammalian DSB-repair-pathway, the Ku70-Ku80-heterodimer recognizes DSBs and  
58 maintains the broken DNA-ends in close proximity until the DSB is rejoined [4]. In addition,  
59 the phosphorylated histone variant of H2AX,  $\gamma$ H2AX, recruits repair proteins such as 53  
60 binding protein 1 (53BP1) to the chromatin surrounding the DSB. Specific primary and  
61 fluorescent secondary antibodies against  $\gamma$ H2AX and 53BP1 localized in DSB-repair-foci [5,  
62 6] may be used as markers to quantify DSB repair by immunofluorescence microscopy  
63 (IFM).

64 Assuming that each  $\gamma$ H2AX- or 53BP1-focus corresponds to one DSB, the number of foci in  
65 the nucleus can be applied to measure DNA-damage caused by radiation exposure [7-13].  
66 PBLs are suitable to assess the DNA-damage-response of patients as peripheral blood  
67 samples can be taken repeatedly and at defined time points after irradiation. In addition, the  
68 hematopoietic system is radiosensitive; lymphocytes and their subpopulations well  
69 characterized in terms of their phenotype and function [14-17], and can be reliably isolated

70 from blood [18]. Moreover, PBLs are in the resting state (G<sub>0</sub>) of the cell cycle [19, 20],  
71 thereby resulting in prolonged presence of DNA-damage [21-23].  
72 The limited resolution in IFM for  $\gamma$ H2AX and 53BP1 visualization does not provide full-scale  
73 information regarding individual DSB repair points and radiation sensitivity. Additionally,  
74 individual repair proteins of the Ku70-Ku80-heterodimer cannot be detected as their  
75 fluorescence is not sufficient to differentiate them from the background signal. The detection  
76 of both 53BP1 and the DSB-bound phosphorylated Ku70 (pKu70) would signal incomplete  
77 NHEJ-repair-sites. Here it was sought to assess the impact of both RT and RCT on the  
78 genomic integrity of PBLs. High-resolution transmission-electron-microscopy (TEM) with  
79 gold-labeled pKu70 and 53BP1 [24, 25], in addition to IFM, was used to determine the  
80 suitability of this analysis in assessing individual PBL radiation sensitivity in patients with  
81 different tumor entities (head and neck, or rectal cancers), isodose volumes, irradiation  
82 techniques (IMRT or 3D-CRT), and treatment approaches (RT or RCT).

## 83 **Materials and methods**

### 84 **Patients and treatment conditions**

85 This study was conducted in accordance with the Helsinki declaration and with approval of  
86 the local ethics committee (Aerztekammer des Saarlandes). All patients signed written  
87 informed consent forms. Patients meeting the following inclusion criteria were enrolled  
88 between March 2011 and May 2012: Aged between 18 to 80 years; Karnofsky index >70%;  
89 completely resected head and neck squamous cell cancer (oral cavity, oropharynx,  
90 hypopharynx, or larynx) with postoperative RT indicated with or without chemotherapy; or  
91 diagnosis of rectal cancer with an indication for neoadjuvant or adjuvant pelvic radiotherapy  
92 (with or without chemotherapy). Patients with previous RT or chemotherapy and those with  
93 distant metastases were excluded.  
94 All patients underwent standard computed tomography-based RT-planning with 3D-  
95 conformal target volume delineation. IMRT with a pre-defined PTV arrangement of seven

96 coplanar beam angles with 70 beam-segments and standardized objectives based on the  
97 ICRU Report 83 [26] and constraints for normal tissues (brainstem, spinal cord, parotid  
98 glands, esophagus) based on QUANTEC-data [27] with individualized clinical assessments  
99 was mandatory for patients with head and neck cancer. A 60 Gy reference dose was  
100 prescribed to primary tumor sites and lymph node metastases in cervical regions and 50 Gy  
101 to non-involved cervical and supraclavicular lymph node regions. Single doses were 2.0 Gy,  
102 once daily, 5 days a week. Concomitant chemotherapy, if prescribed, included two cycles of  
103 cisplatin (20 mg/m<sup>2</sup> intravenously over 0.5 h, D1-5; D29-33) and two cycles of 5-fluorouracil  
104 (600 mg/m<sup>2</sup> intravenously over 24 h, D1-5; D29-33). Patients with rectal cancer were treated  
105 in a prone position on a belly board by means of three 3D-conformal coplanar portals (0°;  
106 90°; 270°) with a total reference dose of 50.4 Gy (optional 5.4 Gy boost to the primary tumor  
107 after 45 Gy) and a single dose of 1.8 Gy (once daily, 5 fractions/week). Concurrent  
108 neoadjuvant chemotherapy consisted of two cycles of 5-fluorouracil (1000 mg/m<sup>2</sup>  
109 intravenously over 24 hours, D1-5; D29-33). Adjuvant 5-fluorouracil was administered as a  
110 continuous infusion of 225 mg/m<sup>2</sup> (D1-38). All patients were irradiated with a linear  
111 accelerator (ONCOR™ or ARTISTE™) from Siemens (Erlangen, Germany) using photons of  
112 6 MV for IMRT of head and neck cancers or 18 MV for 3D-conformal RT (3D-CRT) of rectal  
113 cancers. The analysis of RT-related parameters included assessment of blood volume  
114 contained within the 50%-isodose line (derived from volumetric computation of delineated  
115 blood vessels >1 cm in diameter), body volumes surrounded by the 10 Gy, 20 Gy, 30 Gy and  
116 45 Gy isodose lines ( $V10_{iso}$  –  $V45_{iso}$ ) and coverage of the PTV ( $D80$ ,  $D90$ ).

## 117 **Blood sampling**

118 For IFM-analysis, blood samples were collected from a cubital vein in heparin-containing  
119 vials at 37°C and diluted 1:2 with pre-warmed Roswell Park Memorial Institute (RPMI) 1640  
120 medium (Biochrom; Berlin, Germany) for immediate processing. All patient samples were  
121 obtained immediately before and 0.5 h after the first RT-fraction (control and induction  
122 values, respectively) and 24 h after the first and fourth RT-fractions in weeks 1, 2, 4 and 6

123 (after fractions 1, 4, 6, 9, 16, 19, and 26; and after fraction 29 in head and neck cancer  
124 samples).

125 To perform TEM-analysis, blood samples were collected directly before and 0.1, 0.5 and 24 h  
126 after the first RT-fraction for immediate processing.

127 For *ex-vivo*-experiments, blood from healthy donors was obtained, PBLs isolated,  
128 homogeneously irradiated, and incubated in RPMI at 37°C.

129 Dose dependence: PBLs were suspended in cold phosphate-buffer saline (PBS), irradiated  
130 with different doses (0.5, 1.0, 2.0 or 4.0 Gy), and suspended in RPMI-Medium (Sigma-  
131 Aldrich, St. Louis, MO) prior to a 0.5 h incubation at 37°C allowing for repair.

132 Time course: Following irradiating with 1.0 Gy, PBLs were incubated in RPMI-Medium at  
133 37°C, and fixated 0.1, 0.25, 2.5, 8.0 and 24 h after irradiation. Non-irradiated PBLs from the  
134 same donor served as control.

### 135 **Blood sample preparation for IFM and TEM**

136 Briefly, blood samples in heparin tubes were diluted with 6 ml RPMI and incubated at 37°C.  
137 PBLs were isolated using a kit (PAA Laboratories; Cölbe, Germany). Blood samples were  
138 layered on Percol 400 and centrifuged at 1200 g for 20 minutes. 5 ml PBS was added to the  
139 resulting interphase and centrifuged at 300 g for 10 minutes. The separation yielded ~80%  
140 PBLs, ~15% monocytes and ~5% granulocytes.

141 For IFM, PBLs were fixed in 100% methanol for 0.5 h and permeabilized in 100% acetone for  
142 1 minute at -20°C. After washing cells in PBS with 1% fetal calf serum for 1 x 10 minutes at  
143 room temperature, samples were incubated with 53BP1 antibody (anti-53BP1, mouse  
144 monoclonal, Merck, Darmstadt, Germany) followed by a secondary fluorescent antibody  
145 (AlexaFluor-488, Invitrogen, Karlsruhe, Germany). Samples were mounted using Vectashield  
146 mounting medium (Vector Laboratories, Burlingame, CA) with DAPI (4',6-Diamidino-2-  
147 phenylindole). Fluorescent images were captured and visually analyzed. A trained staff  
148 member identified and counted the cells until at least 300 cells and 40 foci for each time point

149 were registered. All PBLs in each field of view were analyzed, even those without evidence  
150 of radiation damage.

151 For TEM, PBL pellets were fixed overnight with 2% paraformaldehyde and 0.05%  
152 glutaraldehyde in PBS. The ethanol-dehydrated samples were infiltrated with LR Gold resin  
153 (EMS, Hatfield, PA). Afterwards, samples were embedded in resin containing 0.1% benzyl  
154 and kept for 24 h at -20°C followed by ultraviolet light exposure until resin was polymerized.  
155 Ultrathin 70 nm slices were sectioned off the samples using a Microtome Ultracut UCT  
156 (Leica, Biel, Switzerland), picked up on pioloform-coated nickel grids, and processed for  
157 immunogold labeling. To block non-specific staining, sections were floated on drops of 50  
158 mM glycine and blocking solution. Afterwards, following rinsing, sections were incubated with  
159 different primary antibodies (53BP1 or pKu70 (anti-pKu70, rabbit polyclonal, pSer5, Abcam,  
160 Cambridge)) overnight at 4°C. The same primary antibodies used in fluorescence  
161 microscopy were applied in combination with gold-labeled secondary antibodies for TEM  
162 experiments in order to visualize pKu70 and detect incomplete DNA damage repair sites. A  
163 single IFM-focus has a diameter of approximately 1.0  $\mu\text{m}$  (S1A Fig; green circle). When  
164 using gold-labeled secondary antibodies in the same IFM-approach, this focus consists of  
165 two 53BP1-clusters, each one with a diameter of only 500 nm (S1B Fig; red circles). In TEM  
166 analysis, this focus-area can be subdivided further into euchromatic and heterochromatic  
167 compartments (S1C Fig) and thus allows for reliable detection and quantification of DNA  
168 repair factors (S1D Fig; pKu70, 10 nm, gold beads colored in red; 53BP1, 6 nm, colored in  
169 green) and their localization within different chromatin compartments.

170 After rinsing, goat secondary antibodies conjugated with 6 nm and 10 nm gold particles  
171 (EMS) were applied to the sections on the grids, and then incubated for 1.5 h at room  
172 temperature. Subsequently, sections were washed and fixated with 2% glutaraldehyde in  
173 PBS. All sections were stained with uranyl acetate and examined with a Tecnai Biotwin™  
174 transmission electron microscope (FEI, Eindhoven, Netherlands). For quantification, we  
175 identified pKu70-dimers (two 10 nm gold particles) and 53BP1 bead-clusters (6 nm) visually  
176 at 48000-86000x magnification and counted these in 50 randomly chosen nuclear sections.

## 177 **Statistical analysis**

178 A one sided Mann-Whitney Test was performed using the statistical software OriginPro  
179 (version 8.5, OriginLab Corporation, Northampton, USA) to evaluate potential differences  
180 between data groups. The criterion for statistical significance was  $p \leq 0.05$ .

181 The dispersion index test was used to determine the deviation of foci per cell-distribution at  
182 the 0.5 h data point from Poisson statistics to demonstrate that – in the setting of partial body  
183 irradiation to the head and neck or pelvic region – only a proportion of PBLs was exposed to  
184 irradiation [28, 29]. The test was performed with the software Dose Estimate, version 3.0  
185 (Chilton, United Kingdom).

## 186 **Results**

187 The study population consisted of nine individuals with head and neck or rectal cancers (5  
188 patients received RCT and 4 RT without chemotherapy). Table 1 shows the patients'  
189 characteristics. Based on our assumption that the number of irradiation induced DSBs  
190 depends on the applied dose and irradiation time, patients were grouped according to their  
191 cancer type and the technique applied (patients with head and neck-cancers received IMRT  
192 while those with rectal-cancers underwent 3D-CRT; S2A and S2B Figs). To show the  
193 influence of chemotherapy on DSB-formation, patients were further divided into those who  
194 received chemotherapy and those who did not. In total, 40 samples from patients with head  
195 and neck cancer and 46 from patients with rectal cancer (three technical replicates per  
196 sample) were analyzed.

197 **Table 1. Patients and treatment-characteristics according to cancer type.**

| <b>Category</b>              | <b>head&amp;neck cancer</b> | <b>rectal cancer</b> |
|------------------------------|-----------------------------|----------------------|
| <b>Total no. of patients</b> | 4                           | 5                    |
| <b>Age, years</b>            |                             |                      |
| mean $\pm$ SD                | 64 $\pm$ 5                  | 60 $\pm$ 10          |
| range                        | 60 - 71                     | 50 - 74              |
| <b>Sex, no. (%)</b>          |                             |                      |
| Male                         | 3 (75)                      | 3 (60)               |
| Female                       | 1 (25)                      | 2 (40)               |



|                                                      |                        |                            |
|------------------------------------------------------|------------------------|----------------------------|
| <b>KPS, no. (%)</b>                                  |                        |                            |
| 70                                                   |                        | 1 (20)                     |
| 80                                                   | 4 (100)                | 2 (40)                     |
| 90                                                   |                        | 1 (20)                     |
| 100                                                  |                        | 1 (20)                     |
| <b>T-Stage, no. (%)</b>                              |                        |                            |
| T1                                                   | 1 (25)                 |                            |
| T2                                                   | 3 (75)                 |                            |
| T3                                                   |                        | 4 (80)                     |
| T4                                                   |                        | 1 (20)                     |
| <b>N-Stage, no. (%)</b>                              |                        |                            |
| N0                                                   | 2 (50)                 | 2 (40)                     |
| N1                                                   |                        | 1 (20)                     |
| N2                                                   | 2 (50)                 | 2 (40)                     |
| <b>Chemotherapy*</b> , no. (%)                       | 1 (25)                 | 4 (80)                     |
| <b>Irradiation technique</b>                         | IMRT<br>(6 MV photons) | 3D-CRT<br>(18 MV photons ) |
| <b>Irradiation time per fraction</b>                 |                        |                            |
| mean                                                 | 30 min                 | 7 min                      |
| <b>Total dose, no (%)</b>                            |                        |                            |
| 46.8 Gy                                              |                        | 1 (20)                     |
| 50.4 Gy                                              |                        | 4 (80)                     |
| 60.0 Gy                                              | 4 (100)                |                            |
| <b>PTV, cm<sup>3</sup></b>                           |                        |                            |
| mean ± SD                                            | 1047 ± 226             | 1411 ± 444                 |
| <b>D90-PTV, % ref.-dose ± SD</b>                     | 89 ± 6                 | 94 ± 5                     |
| <b>D80-PTV, % ref.-dose ± SD</b>                     | 95 ± 2                 | 97 ± 3                     |
| <b>Isodose volume, cm<sup>3</sup></b>                |                        |                            |
| V5 <sub>iso</sub> ± SD                               | 6703 ± 1876            | 11961 ± 1411               |
| V10 <sub>iso</sub> ± SD                              | 5184 ± 1447            | 10030 ± 1012               |
| V20 <sub>iso</sub> ± SD                              | 3872 ± 924             | 7099 ± 647                 |
| V30 <sub>iso</sub> ± SD                              | 2704 ± 627             | 5575 ± 510                 |
| V45 <sub>iso</sub> ± SD                              | 1427 ± 384             | 2183 ± 703                 |
| <b>Blood volume<sup>#</sup>, cm<sup>3</sup> ± SD</b> | 117 ± 27               | 173 ± 44                   |

198 SD: standard deviation. KPS: Karnofsky Performance Score. PTV: Planning Target Volume.

199 \*Concurrent chemotherapy regime as described in 'Patients and Methods', three patients with rectal  
200 cancer received neoadjuvant regimen, one patient received adjuvant regimen.

201 <sup>#</sup>Derived from delineated blood vessels >1cm in diameter and encompassed by the 50%-isodose line.

202 Quantification of initial foci induction by IFM was completed on samples taken 0.5 h after the  
203 first RT-fraction. 53BP1-foci were not detected in 39 of 432 PBLs (~10%) from patients with  
204 head and neck cancer and in 50 of 517 (~10%) from those with rectal cancer, confirming that  
205 partial body irradiation causes limited PBL exposure (Table 2). In contrast, no 53BP1-foci

206 could be detected in 85% of the unirradiated PBLs (in total 2735 from 3222 cells) taken  
207 before the first fraction.

208 To compare the appearance of 53BP1-foci among samples from different treatment types,  
209 we looked at the PTV-size, radiation duration and exposed blood volume from delineated  
210 blood vessels (>1 cm diameters) encompassed by the 50%-isodose line. Table 2 shows the  
211 53BP1-foci distribution analysis results measured by IFM 0.5 h after the first RT-fraction.

212 **Table 2. Dispersion analysis of 53BP1-foci distribution 0.5 h after the first RT-fraction as**  
213 **measured by immunofluorescence.**

| Tumor entity                              | 53BP1-yield, foci per cell |    |     |     |    |    |    |    |    |
|-------------------------------------------|----------------------------|----|-----|-----|----|----|----|----|----|
|                                           | 0                          | 1  | 2   | 3   | 4  | 5  | 6  | 7  | ≥8 |
| <b>Head&amp;neck cancer, no. of cells</b> |                            |    |     |     |    |    |    |    |    |
| Observed distribution*                    | 39                         | 60 | 61  | 91  | 55 | 52 | 26 | 21 | 27 |
| Poisson distribution                      | 14                         | 48 | 82  | 94  | 80 | 56 | 32 | 16 | 4  |
| <b>Rectal cancer, no. of cells</b>        |                            |    |     |     |    |    |    |    |    |
| Observed distribution#                    | 50                         | 66 | 103 | 100 | 81 | 47 | 32 | 17 | 21 |
| Poisson distribution                      | 22                         | 68 | 108 | 114 | 92 | 58 | 32 | 14 | 8  |

214 \* 432 PBLs were analyzed in four patients. The resulting distribution significantly deviates from a  
215 Poisson distribution, indicating a partial body irradiation [mean dispersion index is  $1.8 \pm 0.1$  (standard  
216 error of the mean), U value (standard normal deviate) is 8.3, and irradiated fraction of cells is 93% as  
217 calculated with the contaminated Poisson method.

218 # 517 PBLs were analyzed in five patients. The resulting distribution significantly deviates from a  
219 Poisson distribution, indicating a partial body irradiation [mean dispersion index is  $1.6 \pm 0.1$ , U value is  
220 6.3, and irradiated fraction of cells is 93% as calculated with the contaminated Poisson method].

221 The 53BP1-foci distribution of homogeneous *ex-vivo*-irradiated PBLs follows the Poisson  
222 statistic [30, 31] as shown in Table 2. A linear dose response relationship was found 0.5 h  
223 after irradiation (0.5 - 4.0 Gy) (Figs 1A and 1C) and in 53BP1-foci loss 24 h post exposure  
224 (1.0 Gy) (Figs 1B and 1D).

225 **Fig 1. Dose dependence and time course of 53BP1 focus formation.** (A) Immunofluorescence-  
226 staining for 53BP1 in PBLs analyzed before (non-IR) and 0.5 h after homogeneous irradiation with 1.0,  
227 2.0 or 4.0 Gy. (B) Time kinetics of radiation-induced 53BP1-foci. (C,D) 53BP1 were visually counted  
228 as number of foci/cell. All points are mean values of three different experiments where at least 300

229 cells were counted from 10 randomly chosen fields of view [\* statistically significant differences ( $p$   
230  $\leq 0.05$ ) compared with non-irradiated controls and previous values].

231 Fig 2A shows the amount of 53BP1-foci per cell counted at each time point for all patients  
232 stratified by tumor entity using IFM.

233 The control showed a low number of foci in patients with head and neck cancer ( $0.37 \pm 0.02$   
234 53BP1-foci/cell) and in those with rectal cancer ( $0.33 \pm 0.08$  53BP1-foci/cell). At 0.5 h after  
235 the first RT-fraction, we found a 10-fold rise in the 53BP1-foci number in head and neck  
236 cancer patient samples ( $3.54 \pm 0.46$  53BP1-foci/cell) and rectal cancer patient samples ( $3.17$   
237  $\pm 0.40$  53BP1-foci/cell). Over time, PBLs from both groups showed a decrease in foci  
238 numbers, although it was still possible to visualize an average number of  $1.46 \pm 0.05$  53BP1-  
239 foci/cell in PBLs from head and neck cancer patients and  $1.97 \pm 0.17$  (~62%) 53BP1-foci/cell  
240 in PBLs from rectal-cancer patients 24 h after the first fraction (1x) (Fig 2B).

241 With increasing numbers of administered RT-fractions (up to 30x), the 53BP1-foci  
242 accumulated. Patients with head and neck cancer had  $2.49 \pm 0.30$  53BP1-foci/cell (5x) 24 h  
243 after the first week of RT-fractions and  $4.31 \pm 0.65$  53BP1-foci/cell (30x) 24 h after further  
244 irradiation. Patients with rectal-cancer had  $2.81 \pm 0.29$  53BP1-foci/cell (5x) and  $4.07 \pm 0.44$   
245 53BP1-foci/cell (25x), respectively (Fig 2A).

246 The 53BP1-foci-levels in PBLs of patients with head and neck cancer tended to outnumber  
247 those of patients with rectal cancer; however, the differences were not significant. Moreover,  
248 we analyzed the number of 53BP1-foci according to whether patients received  
249 accompanying chemotherapy (Fig 2B). Patients receiving chemotherapy had  $1.69 \pm 0.16$   
250 53BP1-foci/cell, 24 h after the first RT-fraction (1x) and those without chemotherapy had  $1.02$   
251  $\pm 0.04$  53BP1-foci/cell at the same time point. During the course of therapy, 53BP1  
252 accumulated to  $2.74 \pm 0.08$  foci/cell (5 days after start of RT) up to  $3.78 \pm 0.34$  foci/cell (36  
253 days after start of RT). Without accompanying chemotherapy, 53BP1-foci values were  
254 significantly lower with  $1.70 \pm 0.24$  53BP1-foci/cell (5 days after start of RT) up to  $3.17 \pm 0.86$   
255 53BP1-foci/cell (26 days after start of RT).

256 **Fig 2. Quantification of 53BP1-foci by IFM.** (A) The number of 53BP1-foci per PBL nucleus was  
257 counted before (non-IR), 0.5 h and 24 h after the first dose fraction (1x) as well as, 24 h after a  
258 predefined number of additional *in-vivo* irradiation fractions (5x to 30x) to the head and neck (n = 4) or  
259 rectal (n = 5) regions. Data are presented as mean values of three technical replicates per patient  $\pm$   
260 standard error. (B) 24h-data during fractionated RT progression, stratified by the administration of  
261 concurrent chemotherapy. Data are presented as mean values of three technical replicates per patient  
262  $\pm$  standard error; the background number of foci/cell (control in week 1 before irradiation) was  
263 subtracted from the data. \* Significant difference to RT patients ( $p \leq 0.05$ ).

264 The quantification of 53BP1-foci through IFM enables the estimation of DNA-repair capacity  
265 after irradiation exposure. Application of TEM-analysis improved the resolution of DNA  
266 damage patterns which are obscured in IFM by the fluorescence of the labeled foci.  
267 Quantification of pKu70 and 53BP1 in PBLs after homogeneous *ex-vivo* irradiation verified  
268 the suitability and reliability of the TEM-method. Immunogold labeling of PBLs for pKu70 (10  
269 nm bead-size, colored in red) and 53BP1 (6 nm, colored in green), was completed 0.5 h after  
270 1.0 Gy irradiation. Colocalization of 53BP1-clusters with pKu70-dimers was observed  
271 exclusively in heterochromatic areas. Additionally, pKu70-single-beads and small 53BP1-  
272 clusters (2 to 5 beads) were occasionally present at the border between euchromatic and  
273 heterochromatic domains (Fig 3A).

274 In line with previous data [32], quantification of a dose response (0.1, 0.5, 1.0, 2.0 or 4.0 Gy)  
275 0.5 h after irradiation revealed that the total number of pKu70-dimers and 53BP1-clusters  
276 was dose-dependent (Figs 3B and 3C). Gold bead dimers and clusters were normalized to  
277 nuclear area and section thickness (pKu70-dimers/ $\mu\text{m}^3$  or 53BP1-clusters/ $\mu\text{m}^3$ ).

278 A straight-line correlation from 0.12 pKu70/ $\mu\text{m}^3$  (1.0 Gy) up to 3.03 pKu70/ $\mu\text{m}^3$  (4.0 Gy) with  
279 a background signal of 0.10 pKu70/ $\mu\text{m}^3$  in non-irradiated PBLs was demonstrated. The  
280 number of induced pKu70-dimers in euchromatin was consistently lower (from 0.04  
281 pKu70/ $\mu\text{m}^3$  at 0.1 Gy to 0.65 pKu70/ $\mu\text{m}^3$  at 4.0 Gy) than those reached in heterochromatin  
282 (from 0.08 pKu70/ $\mu\text{m}^3$  to 2.38 pKu70/ $\mu\text{m}^3$ ). This indicates that 0.5 h after irradiation, portions  
283 of the originally induced euchromatic DNA damage was no longer present, whereas, the  
284 highest recognition of heterochromatic DSBs took place at this time point. The number of

285 53BP1-clusters and pKu70-dimers almost correlate completely (from 0.08 53BP1/ $\mu\text{m}^3$  to 2.17  
286 53BP1/ $\mu\text{m}^3$ ) due to their colocalization.

287 Analysis of the time kinetics occurred in the same manner, only at different time points (0.1,  
288 0.25, 0.5, 2.5, 8.0 and 24 h) after homogeneous irradiation with 1.0 Gy. Highest values of  
289 pKu70-dimers were observed in euchromatic compartments after 0.1 h (1.44 pKu70/ $\mu\text{m}^3$ ).  
290 Ultimately, this value decreased to 1.03 pKu70/ $\mu\text{m}^3$  (~72%) after 0.25 h, to 0.46 pKu70/ $\mu\text{m}^3$   
291 (~32%) after 0.5 h, to 0.12 pKu70/ $\mu\text{m}^3$  (~8%) after 2.5 h, to 0.06 pKu70/ $\mu\text{m}^3$  (~4%) after 5 h  
292 and to 0.04 pKu70/ $\mu\text{m}^3$  (~3%) after 24 h (Fig 3D). These results suggest that euchromatic  
293 DSBs are quickly recognized following irradiation and can be completely repaired within a  
294 few hours. On the contrary, the number of heterochromatic pKu70-dimers initially rose from  
295 0.10 pKu70/ $\mu\text{m}^3$  (0.1 h post-IR) to 0.80 pKu70/ $\mu\text{m}^3$  (0.25 h post-IR) and to 1.41 pKu70/ $\mu\text{m}^3$   
296 (0.5 h post-IR). Subsequently, the pKu70-dimers began to decrease in numbers 2.5 h after  
297 irradiation to 0.66 pKu70/ $\mu\text{m}^3$  (~47%), to 0.32 pKu70/ $\mu\text{m}^3$  (~23%) after 8 h, and to 0.16  
298 pKu70/ $\mu\text{m}^3$  (~11%) after 24 h. The 53BP1-clusters showed roughly the same kinetics as the  
299 heterochromatic pKu70-dimers with an increase from 0.10 53BP1/ $\mu\text{m}^3$  (0.1h post-RT) to 0.80  
300 53BP1/ $\mu\text{m}^3$  (0.25h post-IR), and 1.41 53BP1/ $\mu\text{m}^3$  (0.5h post-IR). Then, 0.66 53BP1/ $\mu\text{m}^3$   
301 (~47%) 53BP1-clusters were detectable after 2.5 h and decreased to 0.34 53BP1/ $\mu\text{m}^3$   
302 (~24%) after 8 h, and 0.21 53BP1/ $\mu\text{m}^3$  (~15%) were still visible after 24 h (Fig 3E).  
303 Additionally, 53BP1-clusters, consisting of 5 to 12 gold beads and without pKu70  
304 colocalization, were observed 8 h and 24 h after irradiation, potentially marking chromatin  
305 changes in areas where DNA-damage was present.

306 **Fig 3. Quantification of pKu70-dimers and 53BP1-clusters by TEM after homogeneous**  
307 **irradiation with 1.0 Gy.** (A) Visualization of pKu70 (red, 10 nm beads) and 53BP1 (green, 6 nm) 0.5 h  
308 after 1 Gy irradiation in a representative TEM-image. Framed regions shown at higher magnification in  
309 adjacent images. Quantification of pKu70-dimers and 53BP1-clusters (quantified in  $\geq 50$  nuclear  
310 sections) in eu- and heterochromatin 0.5 h after irradiation with different doses (B, C) and at different  
311 time points after irradiation with 2 Gy (D; E).

312 To expand our knowledge on DNA-damage, we investigated PBLs of patients with head and  
313 neck cancer after RT and RCT using TEM, before and 0.1, 0.5 and 24 h after the first fraction  
314 by quantifying pKu70-dimers and 53BP1-clusters in euchromatin and heterochromatin of 50  
315 nuclear sections per sample. Figs 4A and 4B show representative TEM-micrographs.  
316 Visualization of 10-nm (pKu70-dimers) and 6-nm-gold beads (53BP1-cluster) was improved  
317 by overlaying with red and green circles respectively. The RCT-patient (Figs 4C-F) showed a  
318 higher level of repair proteins than the RT-patient in both chromatin domains (Fig 4C) 0.5 h  
319 after the first fraction.

320 Controls showed a low level of pKu70-dimers/ $\mu\text{m}^3$  (RT:  $0.15 \pm 0.01$  pKu70-dimers/ $\mu\text{m}^3$ ; RCT:  
321  $0.11 \pm 0.01$  pKu70-dimers/ $\mu\text{m}^3$ ). 0.1 h after irradiation no significant differences were found in  
322 pKu70 between RT and RCT (RT:  $1.75 \pm 0.03$  pKu70-dimers/ $\mu\text{m}^3$ ; RCT:  $1.76 \pm 0.04$  pKu70-  
323 dimers/ $\mu\text{m}^3$ ). A similar pattern for 53BP1-clusters could be seen (Fig 4F), with significant  
324 higher values for RCT-patients at 0.5 h and 24 h after the first irradiation (S1 Table).

325 **Fig 4. Quantification of pKu70-dimers and 53BP1-clusters by TEM in PBLs of patients who**  
326 **received RT or RCT.** Visualization of pKu70 and 53BP1 in peripheral blood lymphocytes (PBLs) 24 h  
327 after first RT (A) and RCT (B). TEM quantification of pKu70-dimers per  $\mu\text{m}^3$  in total chromatin (C),  
328 euchromatin (D) and heterochromatin (E) following RT or RCT. Additionally, the number of 53BP1-  
329 beads per  $\mu\text{m}^3$  was quantified in PBLs of RT and RCT patients 0.1, 0.5, and 24 h after the first  
330 radiation fraction.

## 331 Discussion

332 In this study, we questioned whether the DNA damage repair in PBLs during radiotherapy for  
333 head and neck or rectal cancers is influenced by simultaneous chemotherapy or other  
334 variables, such as isodose volume, irradiation time, or by different irradiation techniques  
335 (IMRT or 3D-CRT). Additionally, we investigated how repetitive heterogeneous dose  
336 exposure influences the radiation-induced DNA damage of PBLs, especially in patients  
337 prescribed with concomitant chemotherapeutics. To do this, we quantified 53BP1-foci-

338 formation [8, 9] in *ex-vivo*-irradiated PBLs, and found that not every 53BP1-focus equates to  
339 an unrepaired DSB.

340 IFM is a well-established method to visualize and analyze DNA repair proteins. It has the  
341 advantage of allowing fast examination of many cells. However, this is only possible for  
342 repair factors that accumulate in the vicinity of DSBs in sufficient amounts thereby producing  
343 adequate fluorescent signals. IFM cannot be used to detect pKu70, which binds as a  
344 heterodimer with pKu80 at the ends of DSBs [4, 32]. Visualization of 53BP1-foci using IFM  
345 indicates DSBs, however persisting 53BP1-foci mean fluorescence signals may still be  
346 detectable after the initial damage has been repaired. TEM enables clarification of the repair  
347 status of a DSB as it allows for pKu70 detection, the central repair protein of the NHEJ,  
348 which signals incomplete DNA damage repair.

349 Several factors or modified proteins can be employed to analyze DSBs. One commonly used  
350 factor is the phosphorylated histone protein 2A ( $\gamma$ H2AX), and another is 53BP1. We chose  
351 53BP1 as after DSB induction,  $\gamma$ H2AX is found along several megabase pairs (Mbp) of the  
352 DSB [33], whereas 53BP1 gets recruited to the immediate vicinity of a DSB [34-37]. While  
353 the larger  $\gamma$ H2AX areas are advantageous for IFM as they can be easily detected, they are  
354 not the best choice when applying TEM due to its higher resolution and the need for  
355 combined immunogold labeling. As a result, TEM displays  $\gamma$ H2AX molecules as linear gold  
356 bead accumulations (called bead chains) [24]. Due to the three-dimensional nature of the  
357 nucleus, these bead chains are not found as parallel chains on the surface of the  
358 investigated section. Hence, only parts of the chain can be visualized in each individual  
359 section. As a consequence, allocation of  $\gamma$ H2AX chain-sections to a single DSB (represented  
360 by a pKu70-dimer) in TEM is difficult, especially when several pKu70-dimers are present. On  
361 the contrary, 53BP1 is better suited for TEM since it is detectable locally at the DSB shortly  
362 after irradiation and independently as persisting 53BP1-clusters without pKu70-colocalization  
363 (Figs 4A and 4B).

364 Following homogeneous PBL irradiation, IFM showed a linear 53BP1 dose correlation up to  
365 1 Gy (Fig 1C) and TEM showed similar correlation up to 4 Gy (Fig 3C). With increasing



366 doses (> 1 Gy), the fluorescent signal of individual adjacent foci overlapped, making  
367 quantification in IFM difficult or almost impossible (Fig 1A). This limitation does not occur with  
368 quantitative TEM as gold beads were either present and quantifiable or absent. However,  
369 when LR-gold-resin embedded PBL sections are investigated and quantified using TEM it is  
370 critical to always consider that only plane sections of the nucleus and not the entire cell  
371 nucleus are examined. To gain greater insight in the number of the gold-labeled repair  
372 proteins in the entire nucleus, labeling in 50 nuclei sections per dose or repair time point was  
373 quantified. Additionally, non-homogeneously distributed pKu70-dimers and 53BP1-clusters in  
374 the cell nucleus over the number of nuclei sections was captured as reliably as possible by  
375 counting all 10-nm (pKu70) and 6-nm (53BP1) gold beads. The distance of a 10-nm gold  
376 bead from the antigen or repair protein is a maximum of 28 nm (S3 Fig). In contrast, IFM  
377 enabled visualization and quantification of foci in each entire PBL nucleus. The primary  
378 antibodies and the fluorochrome-coupled secondary antibodies penetrated the fixed cells and  
379 cell nuclei due to the permeabilization step (acetone, 1 min at -20 ° C). In IFM, the degree to  
380 which cell structures were preserved after this chemical treatment was not detectable by  
381 means of the DAPI-signal. No other publications have reported on the structural preservation  
382 and quality of cells after IFM sample preparation. After sectioning embedded PBLs  
383 immunogold-labeled repair proteins were visualized and quantified in TEM. Permeabilization  
384 was not necessary, as antigens were found freely accessible near the surface. All cell  
385 structures (membranes, mitochondria, etc.) were perfectly visible in TEM and optimally  
386 preserved.

387 PBLs, which are often used for biological dosimetry [38] and for the determination of  
388 individual radio-sensitivity [39], do not go through the cell cycle but remain in the G<sub>0</sub>-phase.  
389 Several studies have shown that PBLs sometimes undergo apoptosis 12-24 h after  
390 irradiation, which is characterized by significant chromatin condensation [40, 41]. This  
391 apoptotic chromatin condensation within human PBLs may prevent the decomposition of  
392 residual DNA-repair-foci, which were observed in PBLs 24 h after irradiation [42]. Irradiation-  
393 induced residual foci in condensed chromatin can persist longer than 24 h in apoptotic G<sub>0</sub>-



394 PBLs. Persisting foci are not to be confused with existing DSBs as these especially slow  
395 repaired or unrepaired DSBs are eventually responsible for induction of apoptosis. Moreover,  
396 pulsed-field gel electrophoresis and confocal laser microscopy experiments have shown that  
397 in normal human fibroblasts, repair of existing DSBs does not correspond with the counted  
398 53BP1-foci [43]. Our results confirm this, as 24 h after irradiation 53BP1-clusters often did  
399 not colocalize with pKu70 (Figs 4A and 4B). As we have already reported, DSBs can be  
400 visualized by pKu70-dimers [25, 32] that bind directly to the ends of DSBs. In TEM, lack of  
401 pKu70 within a 53BP1-cluster indicates the absence of a DSB at this point. Therefore, the  
402 frequency of colocalizations between pKu70 and 53BP1 is largely dependent on the point in  
403 time post-irradiation. The recorded accumulation of 53BP1-foci by IFM, in Fig 2A, after an  
404 increasing number of applied fractions, is probably due to a mixture of newly induced DSBs  
405 per daily fraction and the generation of persistent chromatin changes after unfinished or  
406 defective DSB-repairs. Loss of 53BP1-foci occurs through the elimination of aged or  
407 damaged PBLs and the successful repair of DSBs. However, as we observed an overall  
408 increase in the number of 53BP1-foci, especially 24 h post-IR between the first (1x) and last  
409 (25x or 30x) fraction, it is reasonable to assume that at this time point accumulation of  
410 persisting 53BP1-foci was significantly involved, whereas during the previous 24 h more  
411 repairable DSBs were eliminated. Thus, it is not possible to evaluate the repair capacity  
412 based on a rise in 53BP1- foci detected 24 h after irradiation. Most persistent 53BP1-foci  
413 responsible for the increase are located exclusively in the periphery of heterochromatin  
414 domains and contain no pKu70. Most likely, these represent apoptotic processes rather than  
415 unrepaired DSBs. In Fig 2B, we show higher 53BP1-foci-levels for all patients who received  
416 RCT, independent of the collective.

417 By using the higher resolution of TEM in combination with the immunogold-labeling of pKu70  
418 and 53BP1 within the intact nuclear cell ultrastructure, we were able to detect a higher  
419 number of pKu70-dimers in the euchromatin and in the heterochromatin of PBLs in RCT-  
420 patients than in those of patients after a single RT 24 h post-IR (Fig 4). In addition, we  
421 visualized pKu70-dimers individually as well as collectively (2x or 3x pKu70-dimers) which

422 suggests multiple DSBs in close proximity (Fig 4B). These results indicate that the scale of  
423 DNA-damage induced during radiotherapy is affected by the presence of accompanying  
424 chemotherapy. Thus, the number of DSBs in PBLs was not significantly influenced by the  
425 irradiation technique (IMRT or 3D-CRT) or the size of the irradiation field. This, however,  
426 could be due to the possibility that effects induced by IMRT, in which a smaller PTV is  
427 irradiated over a longer period of time, counterbalance those induced in 3D-CRT in which a  
428 larger volume is irradiated over a shorter time-period.

429 Based on these data, we propose that persisting DSBs (pKu70-dimers) represent more  
430 severe damage induced by RCT (1, 2 or more pKu70-dimers representing multiple DNA-  
431 lesions). Repair seems to be difficult or even impossible in these cells. In addition, as  
432 persistent DSBs were detectable only at certain times >0.5 h after irradiation and always at  
433 the edge of heterochromatic domains, we suspect that cellular processes, such as the  
434 opening of densely packed heterochromatic regions containing one or more DSBs, delay  
435 repair. However, not every residual focus is equivalent to a remaining DSB, since pKu70 was  
436 not present at every damage site. Persistent 53BP1-clusters without colocalizing pKu70 are  
437 likely to show chromatin alterations after completion or possibly, defective repair. Therefore,  
438 IFM-53BP1-foci-analyses alone are not adequate to determine the individual repair capacity  
439 after the irradiation of PBLs, as a DSB may be marked by a 53BP1 focus but not every  
440 53BP1 focus represents a DSB.

#### 441 **Acknowledgments**

442 The authors thank Liz Ainsbury and Kai Rothkamm for providing the software Dose Estimate  
443 3.0 and helpful discussions, Patrick Melchior, M.D., for his valuable support in the statistical  
444 analysis of foci yield curves, Sara Timm and Nadine Schuler for excellent technical  
445 assistance in IFM analysis, and Anna Isermann for editorial assistance in the preparation of  
446 the manuscript.

#### 447 **Funding Statement**

448 This research was supported by the German Federal Ministry of Education and Research,  
449 grant number 02NUK035A (grant coordinator Claudia E. Rube). The funders had no role in  
450 study design, data collection and analysis, decision to publish, or preparation of the  
451 manuscript.

#### 452 **Conflict of Interest Statement**

453 The above-mentioned authors state that there are no actual or potential conflicts of interest  
454 to disclose.

#### 455 **Data Availability**

456 All relevant data are within the paper and its supporting information files.

#### 457 **Author Contributions**

458 CER and YL conceived and designed the experiments. YL and PG performed experiments.  
459 CER, YL and JF analyzed the data. CER and CR contributed with reagents, materials and  
460 analysis tools. YL wrote the paper. CER and JF reviewed the manuscript.

461 **References**

462

- 463 1. Blanchard, P., et al., *Meta-analysis of chemotherapy in head and neck cancer (MACH-NC): a*  
464 *comprehensive analysis by tumour site*. *Radiother Oncol*, 2011. **100**(1): p. 33-40.
- 465 2. S. Wallace, B.V.H., Y. Wah Kow. *DNA damage: effects on DNA structure and protein*  
466 *recognition*. in *Ann. N.Y. Acad. Sci.* 1994.
- 467 3. Jackson, S.P., *Sensing and repairing DNA double-strand breaks - Commentary*.  
468 *Carcinogenesis*, 2002. **23**(5): p. 687-696.
- 469 4. Williams, G.J., et al., *Structural insights into NHEJ: Building up an integrated picture of the*  
470 *dynamic DSB repair super complex, one component and interaction at a time*. *DNA Repair*,  
471 2014. **17**: p. 110-120.
- 472 5. Rothkamm, K., et al., *DNA damage foci: Meaning and significance*. *Environ Mol Mutagen*,  
473 2015. **56**(6): p. 491-504.
- 474 6. Panier, S. and S.J. Boulton, *Double-strand break repair: 53BP1 comes into focus*. *Nat Rev Mol*  
475 *Cell Biol*, 2014. **15**(1): p. 7-18.
- 476 7. Redon, C.E., et al., *gamma-H2AX as a biomarker of DNA damage induced by ionizing*  
477 *radiation in human peripheral blood lymphocytes and artificial skin*. *Advances in Space*  
478 *Research*, 2009. **43**(8): p. 1171-1178.
- 479 8. Cucinotta, F.A. and M. Durante, *Cancer risk from exposure to galactic cosmic rays:*  
480 *implications for space exploration by human beings*. *Lancet Oncol*, 2006. **7**(5): p. 431-5.
- 481 9. Marchetti, F., et al., *Candidate protein biodosimeters of human exposure to ionizing*  
482 *radiation*. *Int J Radiat Biol*, 2006. **82**(9): p. 605-39.
- 483 10. Rogakou, E.P., et al., *Megabase chromatin domains involved in DNA double-strand breaks in*  
484 *vivo*. *J Cell Biol*, 1999. **146**(5): p. 905-16.
- 485 11. Watters, G.P., et al., *H2AX phosphorylation as a genotoxicity endpoint*. *Mutat Res*, 2009.  
486 **679**(1-2): p. 50-8.
- 487 12. Geric, M., G. Gajski, and V. Garaj-Vrhovac, *gamma-H2AX as a biomarker for DNA double-*  
488 *strand breaks in ecotoxicology*. *Ecotoxicol Environ Saf*, 2014. **105**: p. 13-21.
- 489 13. Nikolova, T., et al., *The gammaH2AX assay for genotoxic and nongenotoxic agents:*  
490 *comparison of H2AX phosphorylation with cell death response*. *Toxicol Sci*, 2014. **140**(1): p.  
491 103-17.
- 492 14. Rehakova, Z., et al., *CD2(7)+ peripheral blood B-cells are a useful biodosimetric marker in*  
493 *vitro*. *Physiological Research*, 2008. **57**(4): p. 589-600.
- 494 15. Harrington, N.P., et al., *Radiation damage and immune suppression in splenic mononuclear*  
495 *cell populations*. *Clinical and Experimental Immunology*, 1997. **107**(2): p. 417-424.
- 496 16. Leonard, A., et al., *Usefulness and limits of biological dosimetry based on cytogenetic*  
497 *methods*. *Radiation Protection Dosimetry*, 2005. **115**(1-4): p. 448-454.
- 498 17. Sak, A., et al., *gamma-H2AX foci formation in peripheral blood lymphocytes of tumor patients*  
499 *after local radiotherapy to different sites of the body: dependence on the dose-distribution,*  
500 *irradiated site and time from start of treatment*. *Int J Radiat Biol*, 2007. **83**(10): p. 639-52.
- 501 18. Amundson, S.A., et al., *Differential responses of stress genes to low dose-rate gamma*  
502 *irradiation*. *Mol Cancer Res*, 2003. **1**(6): p. 445-52.
- 503 19. Yusuf, I. and D.A. Fruman, *Regulation of quiescence in lymphocytes*. *Trends in Immunology*,  
504 2003. **24**(7): p. 380-386.
- 505 20. Vilasova, Z., et al., *Changes in phosphorylation of histone H2A.X and p53 in response of*  
506 *peripheral blood lymphocytes to gamma irradiation*. *Acta Biochimica Polonica*, 2008. **55**(2): p.  
507 381-390.
- 508 21. Facchino, S., et al., *BMI1 Confers Radioresistance to Normal and Cancerous Neural Stem Cells*  
509 *through Recruitment of the DNA Damage Response Machinery*. *Journal of Neuroscience*,  
510 2010. **30**(30): p. 10096-10111.

- 511 22. Fringer, J. and F. Grinnell, *Fibroblast quiescence in floating collagen matrices - Decrease in*  
512 *serum activation of MEK and RAF but not Ras*. Journal of Biological Chemistry, 2003. **278**(23):  
513 p. 20612-20617.
- 514 23. Pinto, M.M.P.D., N.F.G. Santos, and A. Amaral, *Current status of biodosimetry based on*  
515 *standard cytogenetic methods*. Radiation and Environmental Biophysics, 2010. **49**(4): p. 567-  
516 581.
- 517 24. Rube, C.E., et al., *DNA repair in the context of chromatin: new molecular insights by the*  
518 *nanoscale detection of DNA repair complexes using transmission electron microscopy*. DNA  
519 Repair (Amst), 2011. **10**(4): p. 427-37.
- 520 25. Lorat, Y., et al., *Beyond repair foci: DNA double-strand break repair in euchromatic and*  
521 *heterochromatic compartments analyzed by transmission electron microscopy*. PLoS One,  
522 2012. **7**(5): p. e38165.
- 523 26. Hodapp, N., [The ICRU Report 83: prescribing, recording and reporting photon-beam  
524 *intensity-modulated radiation therapy (IMRT)*]. Strahlenther Onkol, 2012. **188**(1): p. 97-9.
- 525 27. Bentzen, S.M., et al., *Quantitative Analyses of Normal Tissue Effects in the Clinic (QUANTEC):*  
526 *an introduction to the scientific issues*. Int J Radiat Oncol Biol Phys, 2010. **76**(3 Suppl): p. S3-9.
- 527 28. Edwards, A.A., D.C. Lloyd, and R.J. Purrott, *Radiation induced chromosome aberrations and*  
528 *the Poisson distribution*. Radiat Environ Biophys, 1979. **16**(2): p. 89-100.
- 529 29. Rothkamm, K., et al., *Leukocyte DNA damage after multi-detector row CT: a quantitative*  
530 *biomarker of low-level radiation exposure*. Radiology, 2007. **242**(1): p. 244-51.
- 531 30. Savage, J.R. and D.G. Papworth, *Radiation-induced chromosome exchanges in Campelia*  
532 *zanonia (L.) H.B.K.: distortion hypothesis as an alternative to a limited number of sites*.  
533 Nature, 1968. **220**(5162): p. 87-9.
- 534 31. Fleckenstein, J., et al., *The impact of individual in vivo repair of DNA double-strand breaks on*  
535 *oral mucositis in adjuvant radiotherapy of head-and-neck cancer*. Int J Radiat Oncol Biol Phys,  
536 2011. **81**(5): p. 1465-72.
- 537 32. Lorat, Y., et al., *Nanoscale analysis of clustered DNA damage after high-LET irradiation by*  
538 *quantitative electron microscopy--the heavy burden to repair*. DNA Repair (Amst), 2015. **28**:  
539 p. 93-106.
- 540 33. Rogakou, E.P., et al., *DNA double-stranded breaks induce histone H2AX phosphorylation on*  
541 *serine 139*. J Biol Chem, 1998. **273**(10): p. 5858-68.
- 542 34. Schultz, L.B., et al., *p53 binding protein 1 (53BP1) is an early participant in the cellular*  
543 *response to DNA double-strand breaks*. J Cell Biol, 2000. **151**(7): p. 1381-90.
- 544 35. Anderson, L., C. Henderson, and Y. Adachi, *Phosphorylation and rapid relocalization of 53BP1*  
545 *to nuclear foci upon DNA damage*. Mol Cell Biol, 2001. **21**(5): p. 1719-29.
- 546 36. Rappold, I., et al., *Tumor suppressor p53 binding protein 1 (53BP1) is involved in DNA*  
547 *damage-signaling pathways*. J Cell Biol, 2001. **153**(3): p. 613-20.
- 548 37. Huyen, Y., et al., *Methylated lysine 79 of histone H3 targets 53BP1 to DNA double-strand*  
549 *breaks*. Nature, 2004. **432**(7015): p. 406-11.
- 550 38. Prasanna, P.G., et al., *Biological dosimetry using human interphase peripheral blood*  
551 *lymphocytes*. Mil Med, 2002. **167**(2 Suppl): p. 10-2.
- 552 39. Dikomey, E., et al., *Why recent studies relating normal tissue response to individual*  
553 *radiosensitivity might have failed and how new studies should be performed*. Int J Radiat  
554 Oncol Biol Phys, 2003. **56**(4): p. 1194-200.
- 555 40. Markova, E., J. Torudd, and I. Belyaev, *Long time persistence of residual 53BP1/gamma-H2AX*  
556 *foci in human lymphocytes in relationship to apoptosis, chromatin condensation and*  
557 *biological dosimetry*. Int J Radiat Biol, 2011. **87**(7): p. 736-45.
- 558 41. Czene, S., et al., *DNA fragmentation and morphological changes in apoptotic human*  
559 *lymphocytes*. Biochem Biophys Res Commun, 2002. **294**(4): p. 872-8.
- 560 42. Torudd, J., et al., *Dose-response for radiation-induced apoptosis, residual 53BP1 foci and*  
561 *DNA-loop relaxation in human lymphocytes*. Int J Radiat Biol, 2005. **81**(2): p. 125-38.

562 43. Markova, E., N. Schultz, and I.Y. Belyaev, *Kinetics and dose-response of residual*  
563 *53BP1/gamma-H2AX foci: co-localization, relationship with DSB repair and clonogenic*  
564 *survival*. Int J Radiat Biol, 2007. **83**(5): p. 319-29.

## 565 **Supporting information**

566 **S1 Fig.** Different resolution powers of light- and electron microscopy.

567 (A) Immunofluorescent image of 53BP1-foci, 0.5 h after irradiation with 1 Gy in the DAPI-stained  
568 nucleus of a peripheral blood lymphocyte. pKu70 cannot be observed by IFM.

569 (B) Light microscopy image of a PBL-nucleus. By virtue of antibodies targeting 53BP1, two clusters  
570 can be seen (red circles).

571 (C) Electron microscopy image (TEM, 2700x magnification). Euchromatin (bright) and heterochromatin  
572 (dark) can be clearly differentiated within the nucleus.

573 (D) Reliable visualization of immunogold-labeled 53BP1 (green) and pKu70 (red) by means of TEM  
574 (48 000x).

575 **S2 Fig.** Representative isodose distribution. (A) IMRT was mandatory for patients with head and neck  
576 cancer with a pre-defined arrangement of seven coplanar beam angles. (B) For patients with rectal  
577 cancer through 3D-CRT with three coplanar portals. The irradiated volume within the violet isodose  
578 (10% reference dose), varies in size, depending on the cancer type and irradiation modes.

579 **S1 Table.** PBLs of patients with head and neck cancer after RT and RCT were investigated using  
580 TEM, before and 0.1, 0.5 and 24 h after the first fraction by quantifying pKu70-dimers and 53BP1-  
581 clusters in euchromatin and heterochromatin of 50 randomly chosen nuclear sections. Gold bead  
582 dimers and clusters were normalized to nuclear area and section thickness (pKu70-dimers/ $\mu\text{m}^3$  or  
583 53BP1-clusters/ $\mu\text{m}^3$ ) and presented as mean values.

584 **S3 Fig.** 3D-model (using *computer-aided design*, AutoCAD 2017, Autodesk GmbH, USA) of a primary  
585 antibody, bound to a secondary antibody coupled to a 10 nm colloidal gold particle.



### A Dose dependence of 53BP1 focus formation

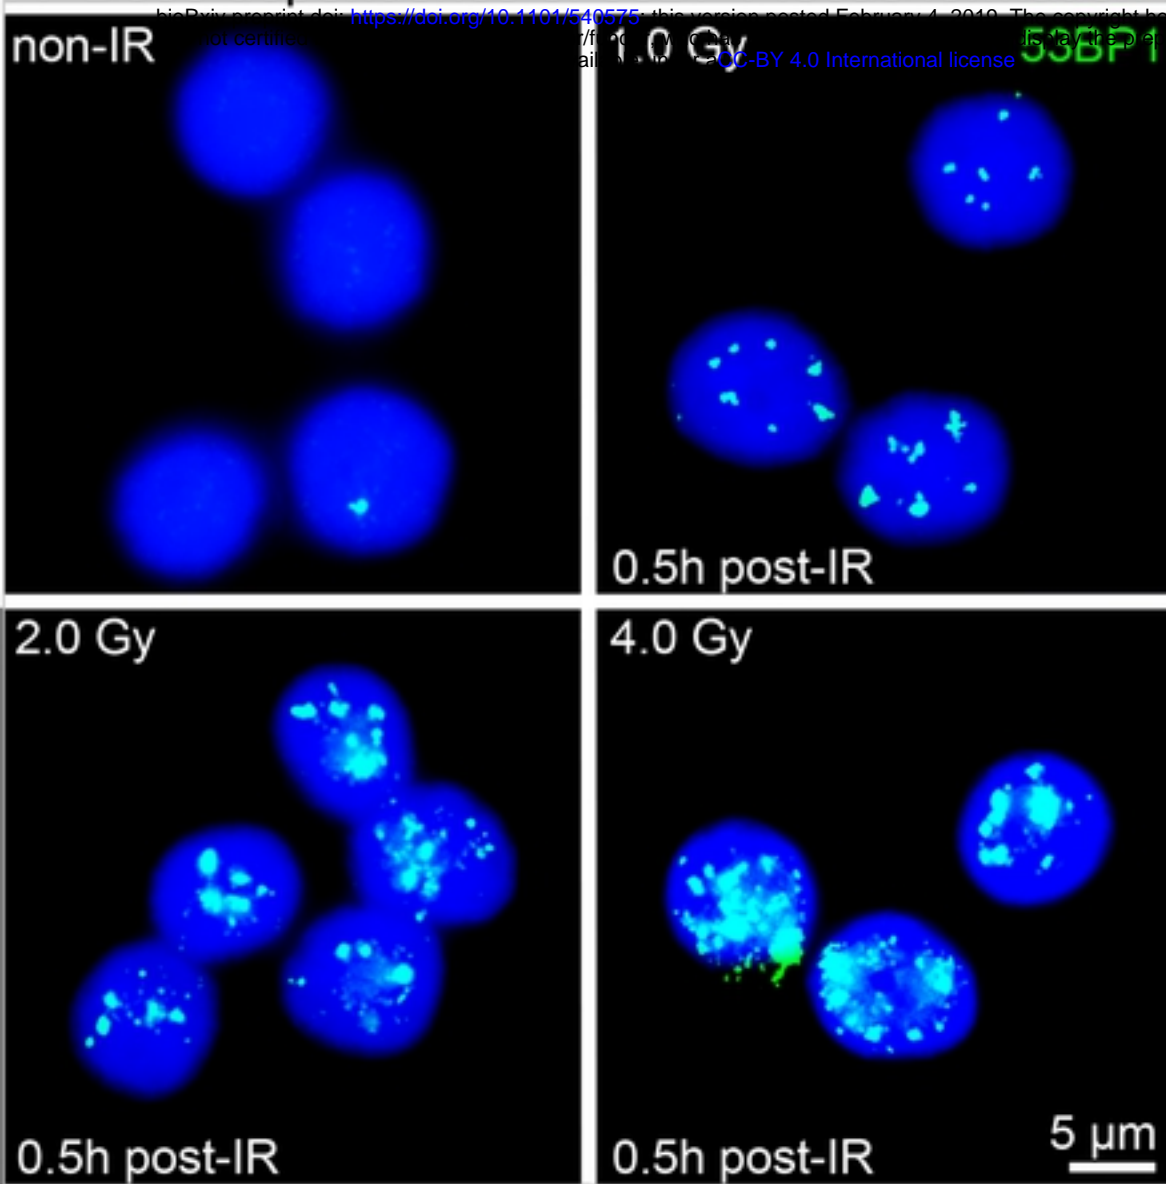

### B Time course of 53BP1 focus formation

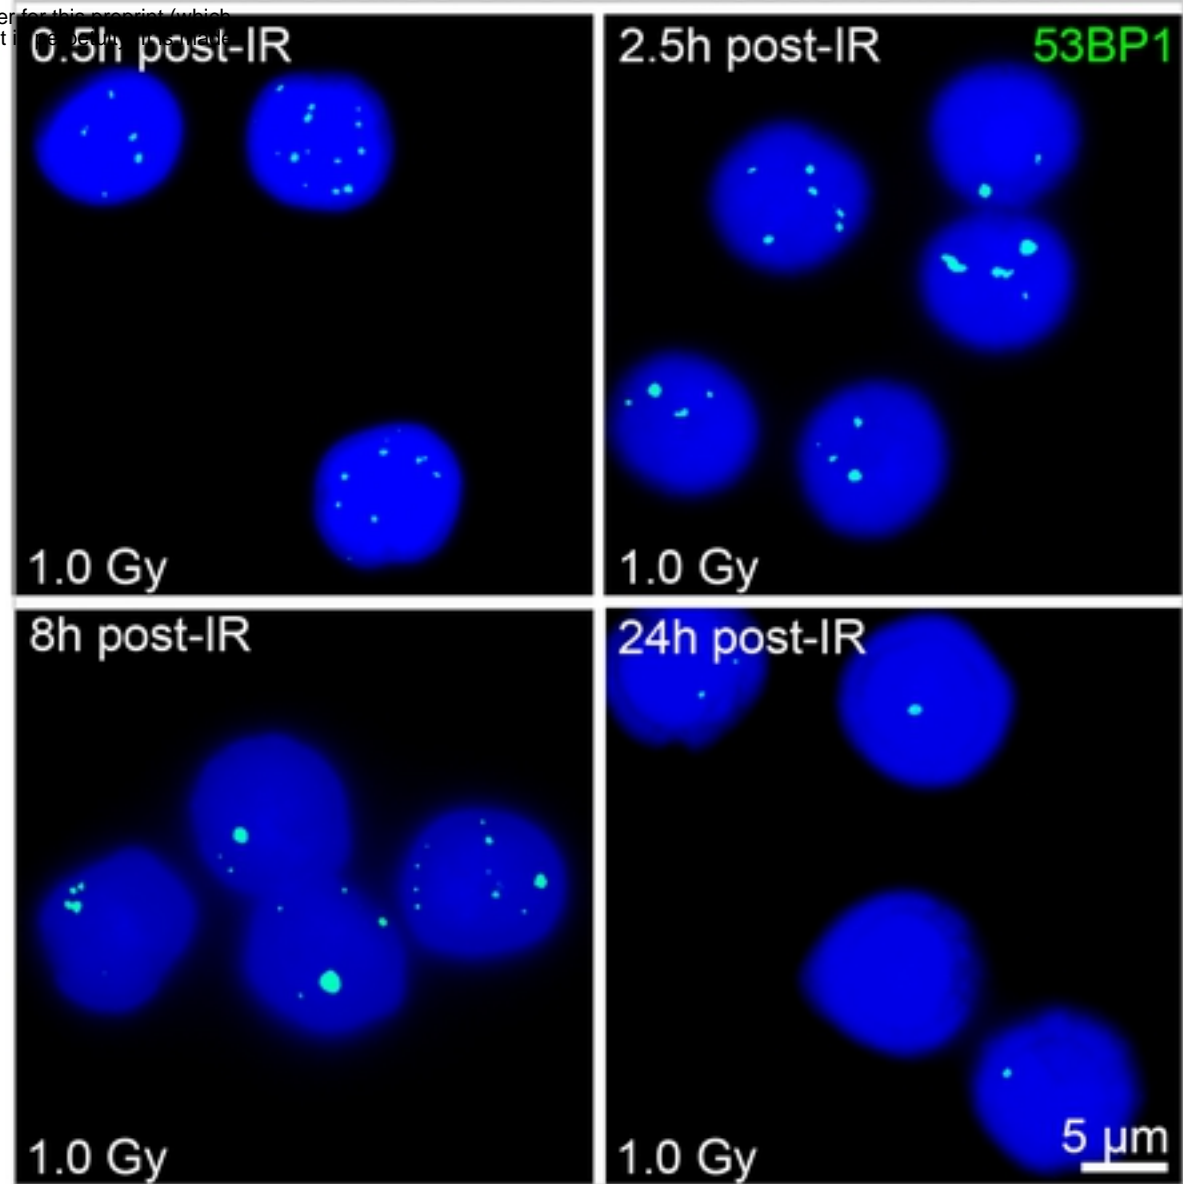

### C Dose response

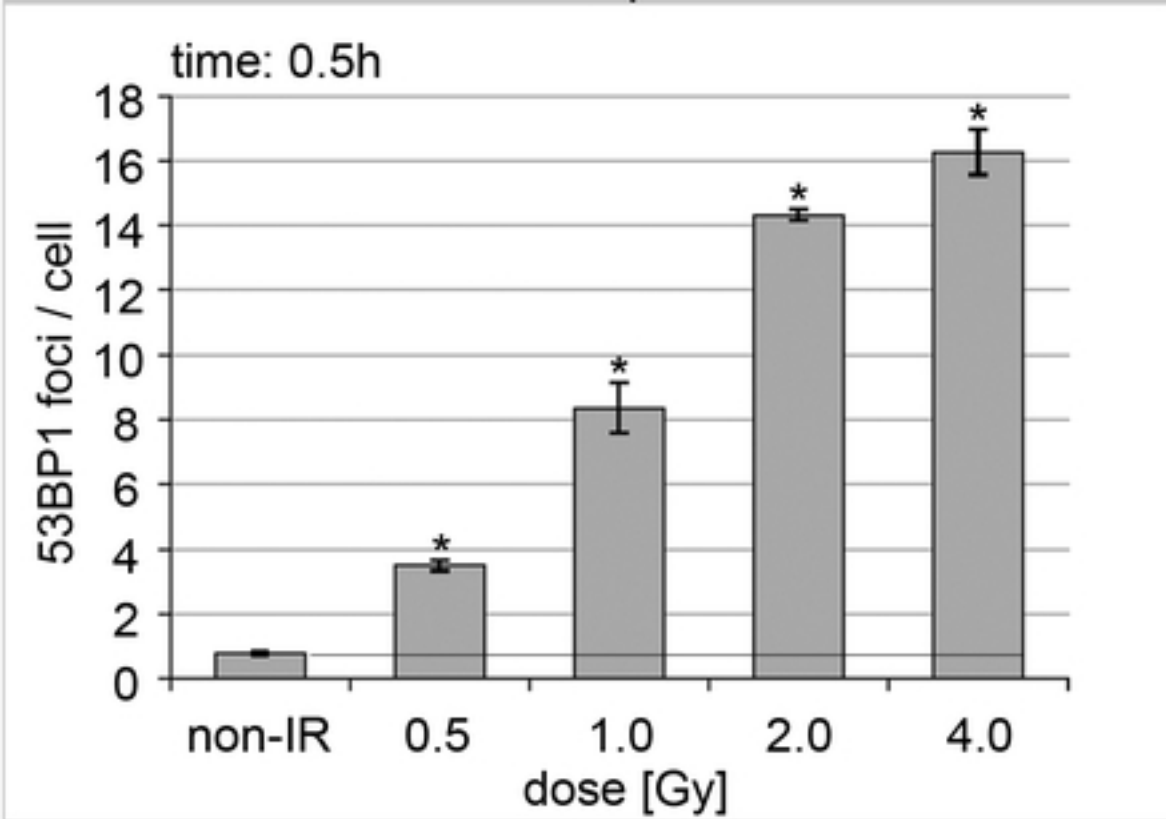

### D Time course

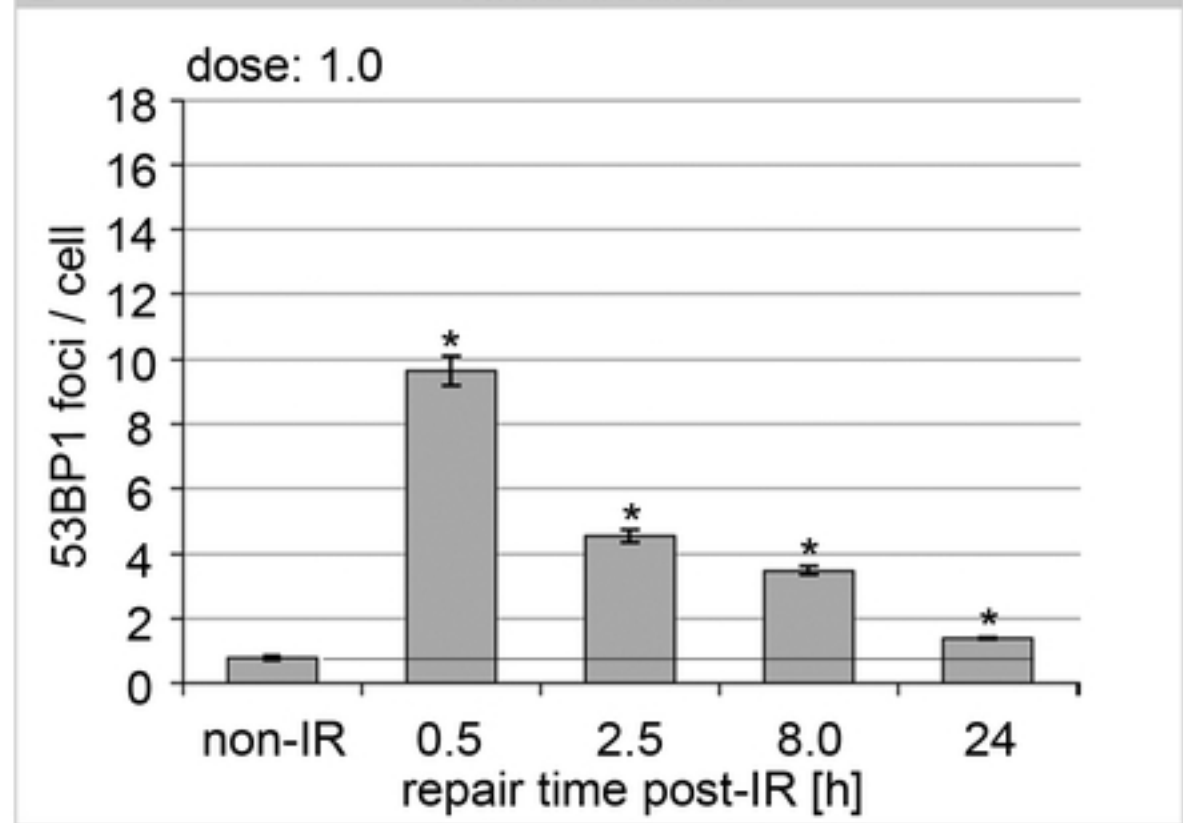

Fig 1

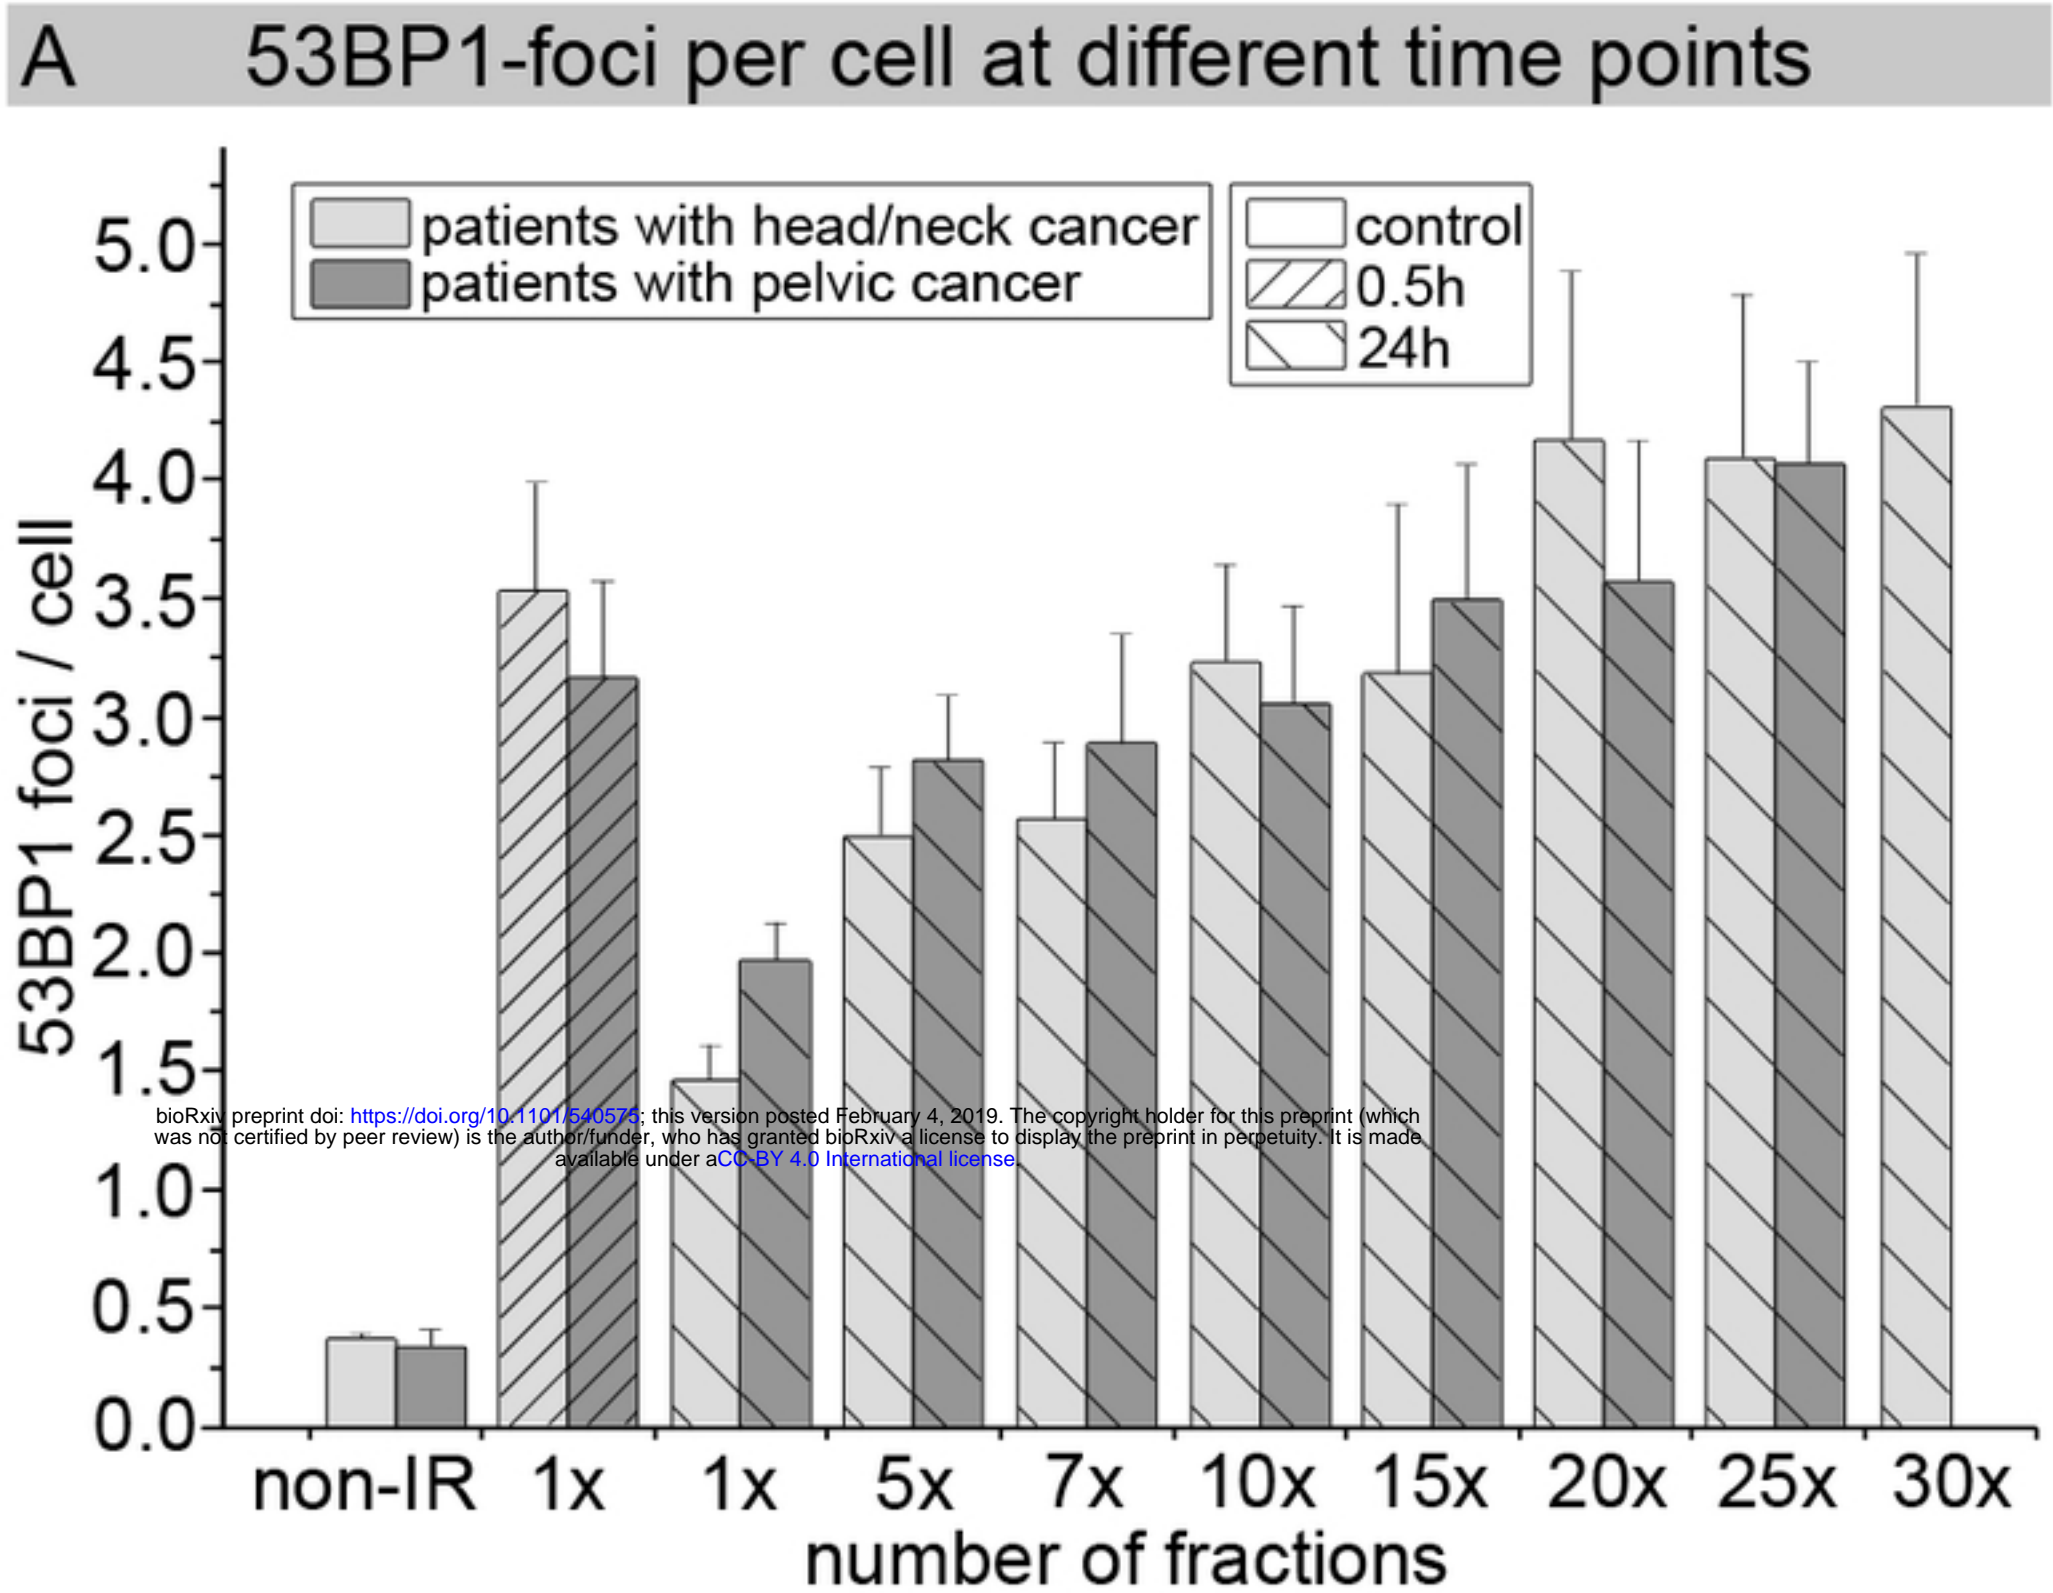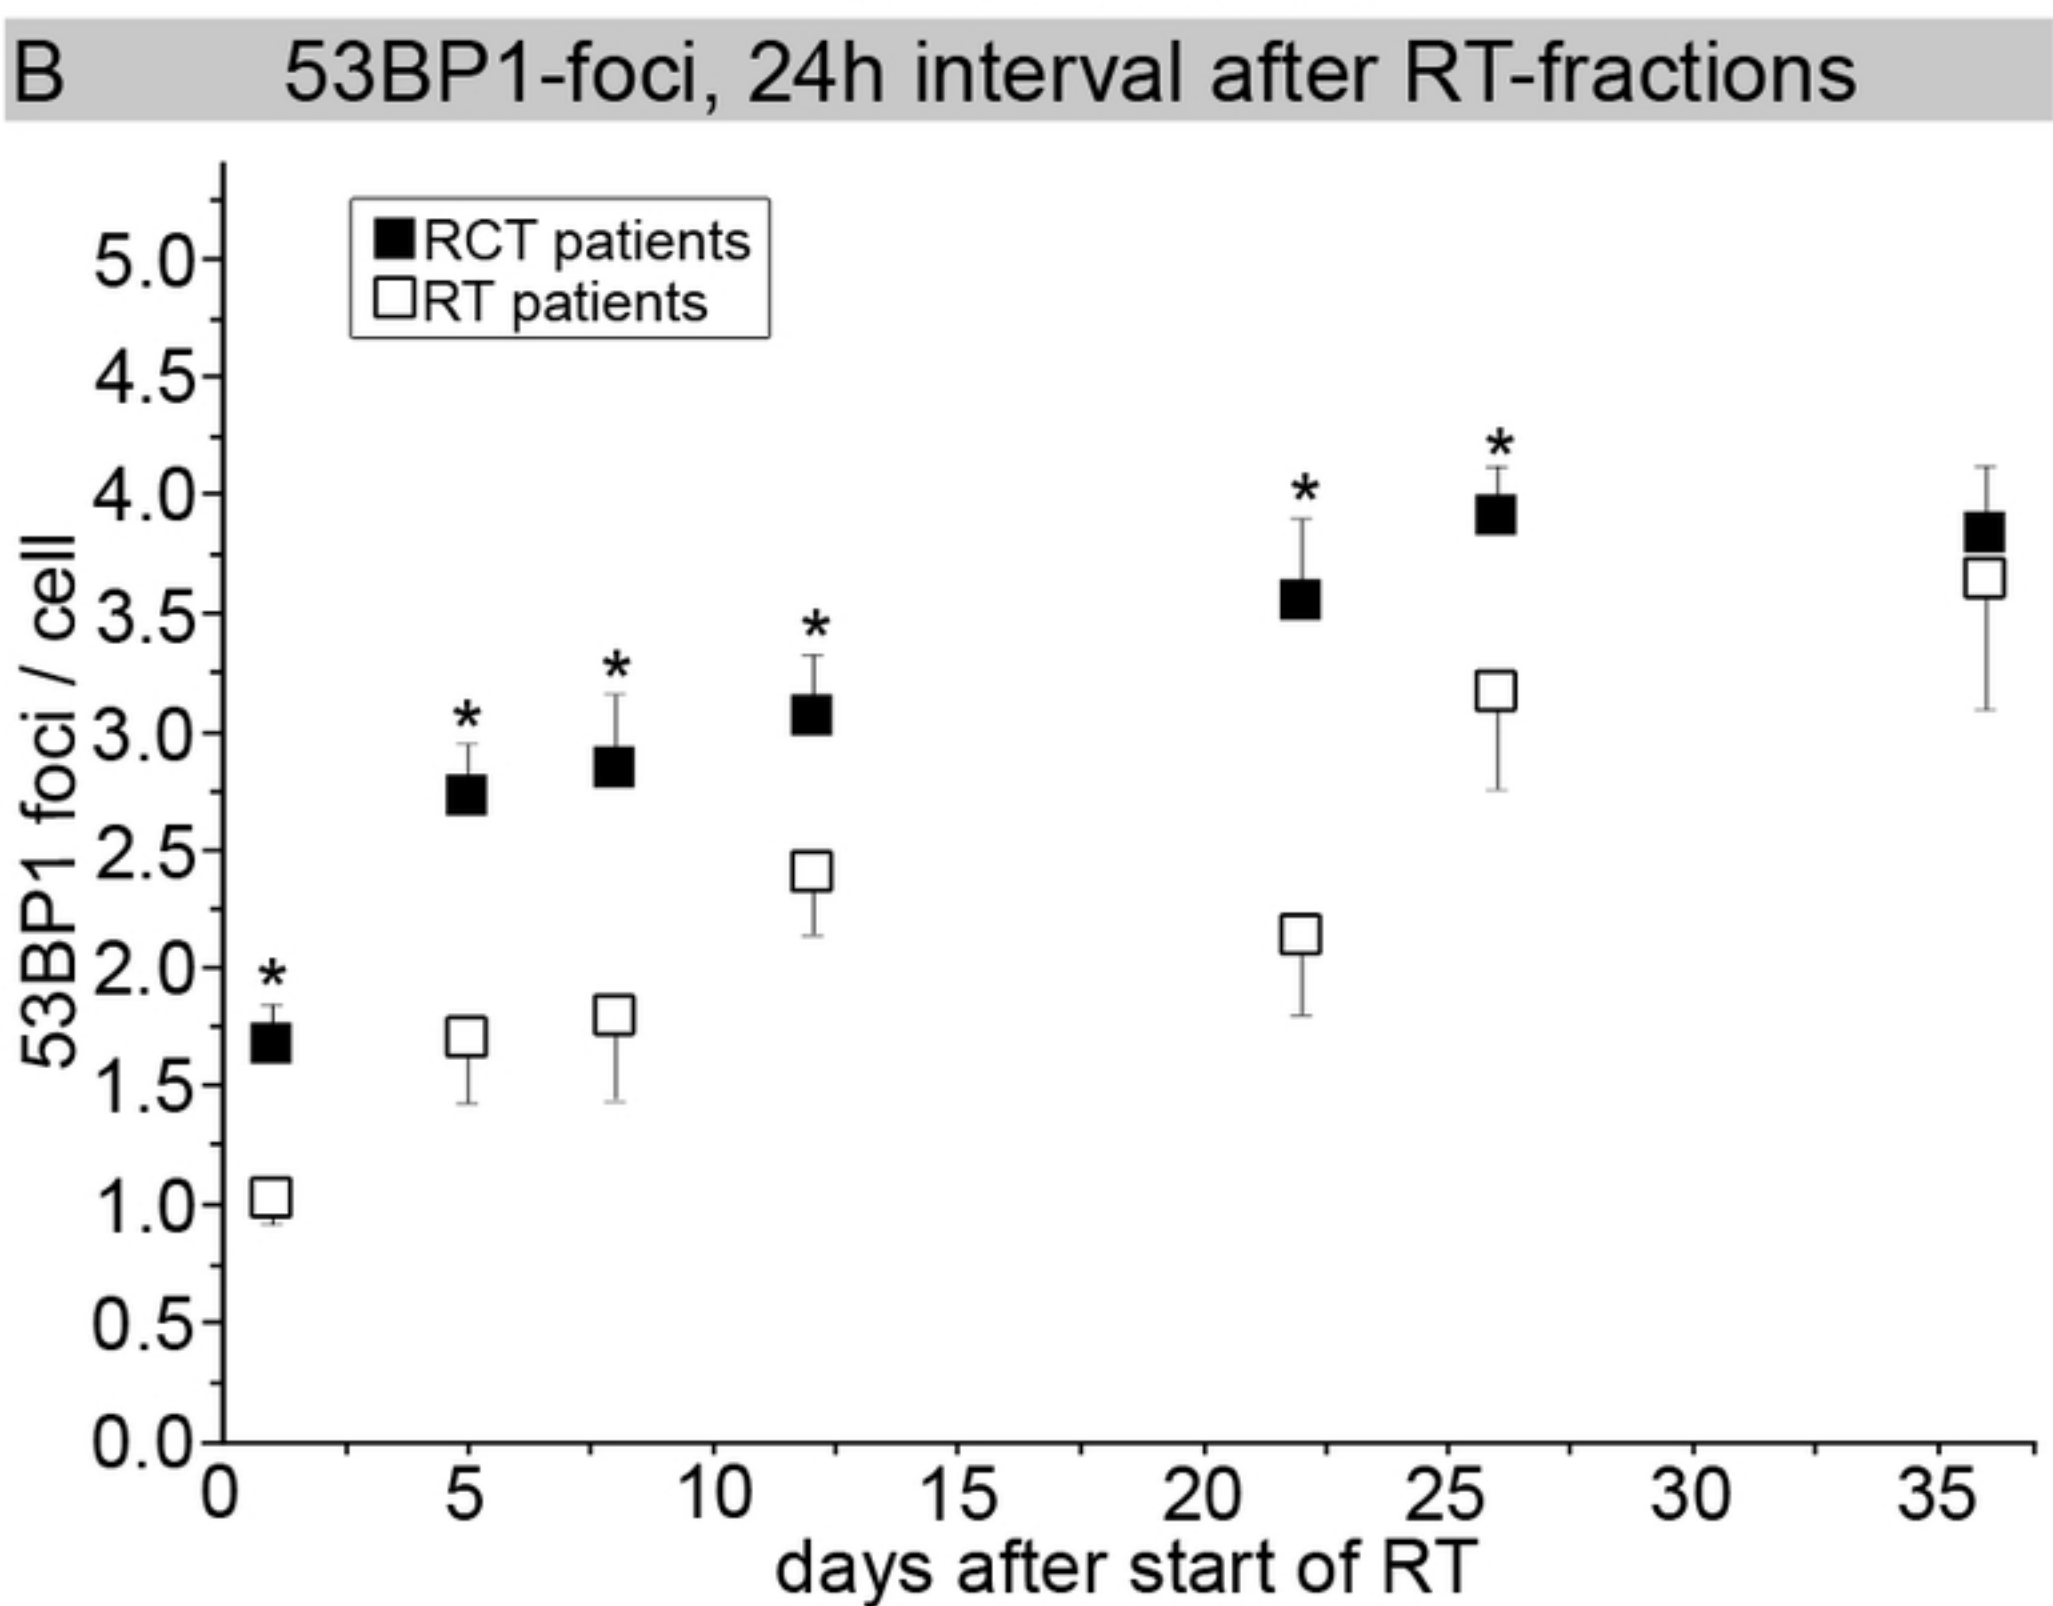

Fig 2



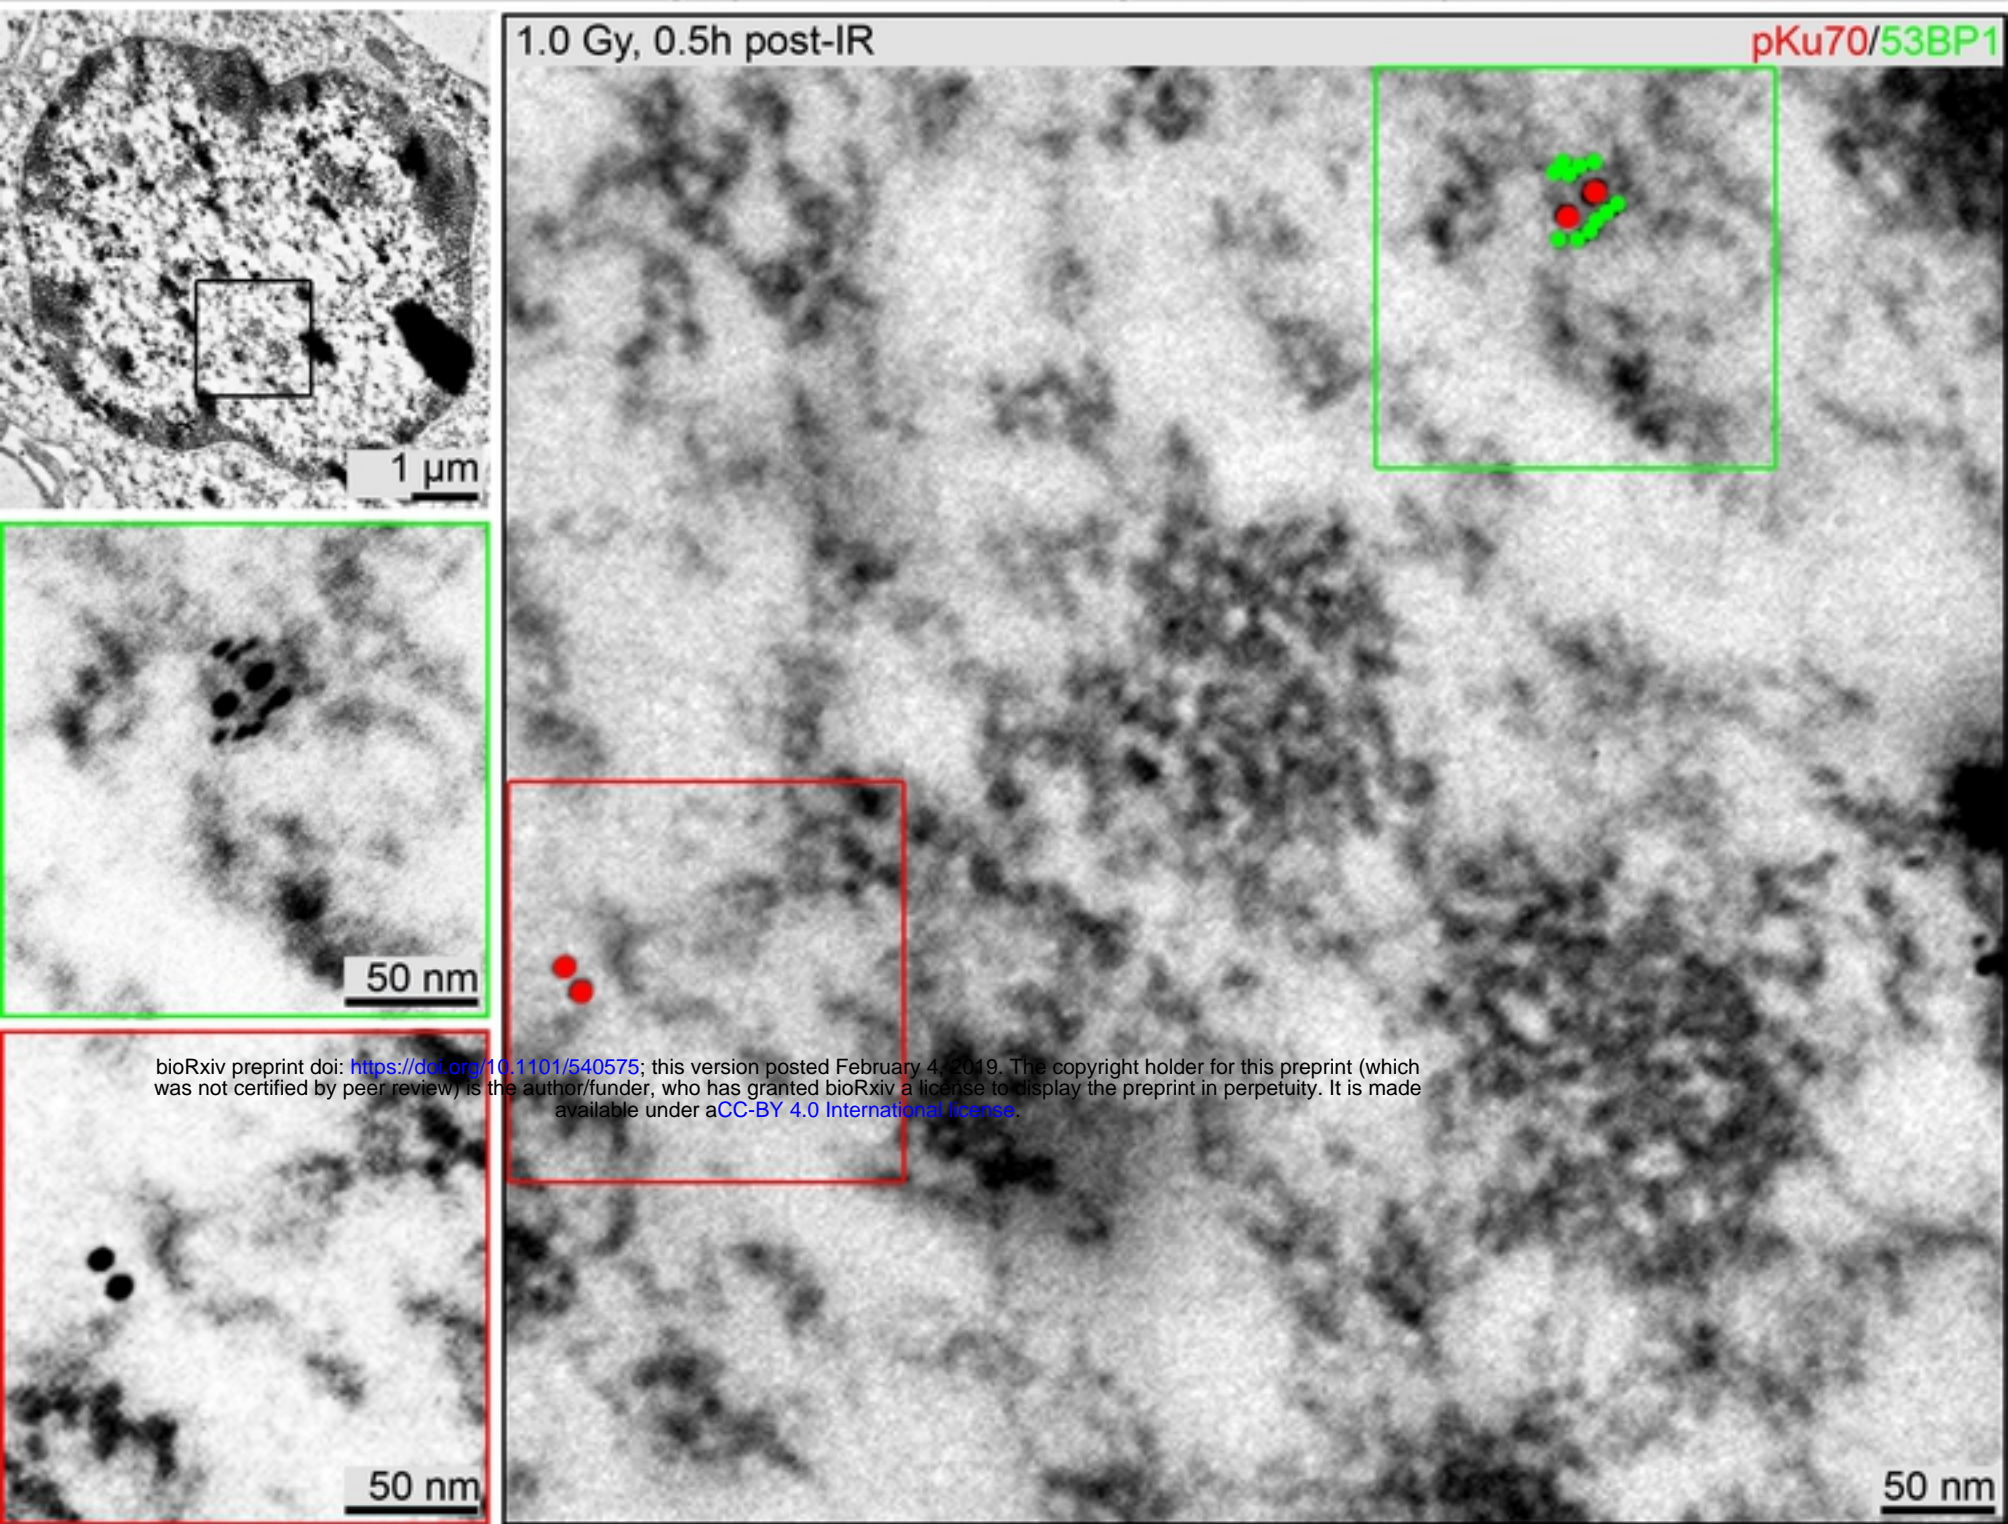

bioRxiv preprint doi: <https://doi.org/10.1101/540575>; this version posted February 4, 2019. The copyright holder for this preprint (which was not certified by peer review) is the author/funder, who has granted bioRxiv a license to display the preprint in perpetuity. It is made available under aCC-BY 4.0 International license.

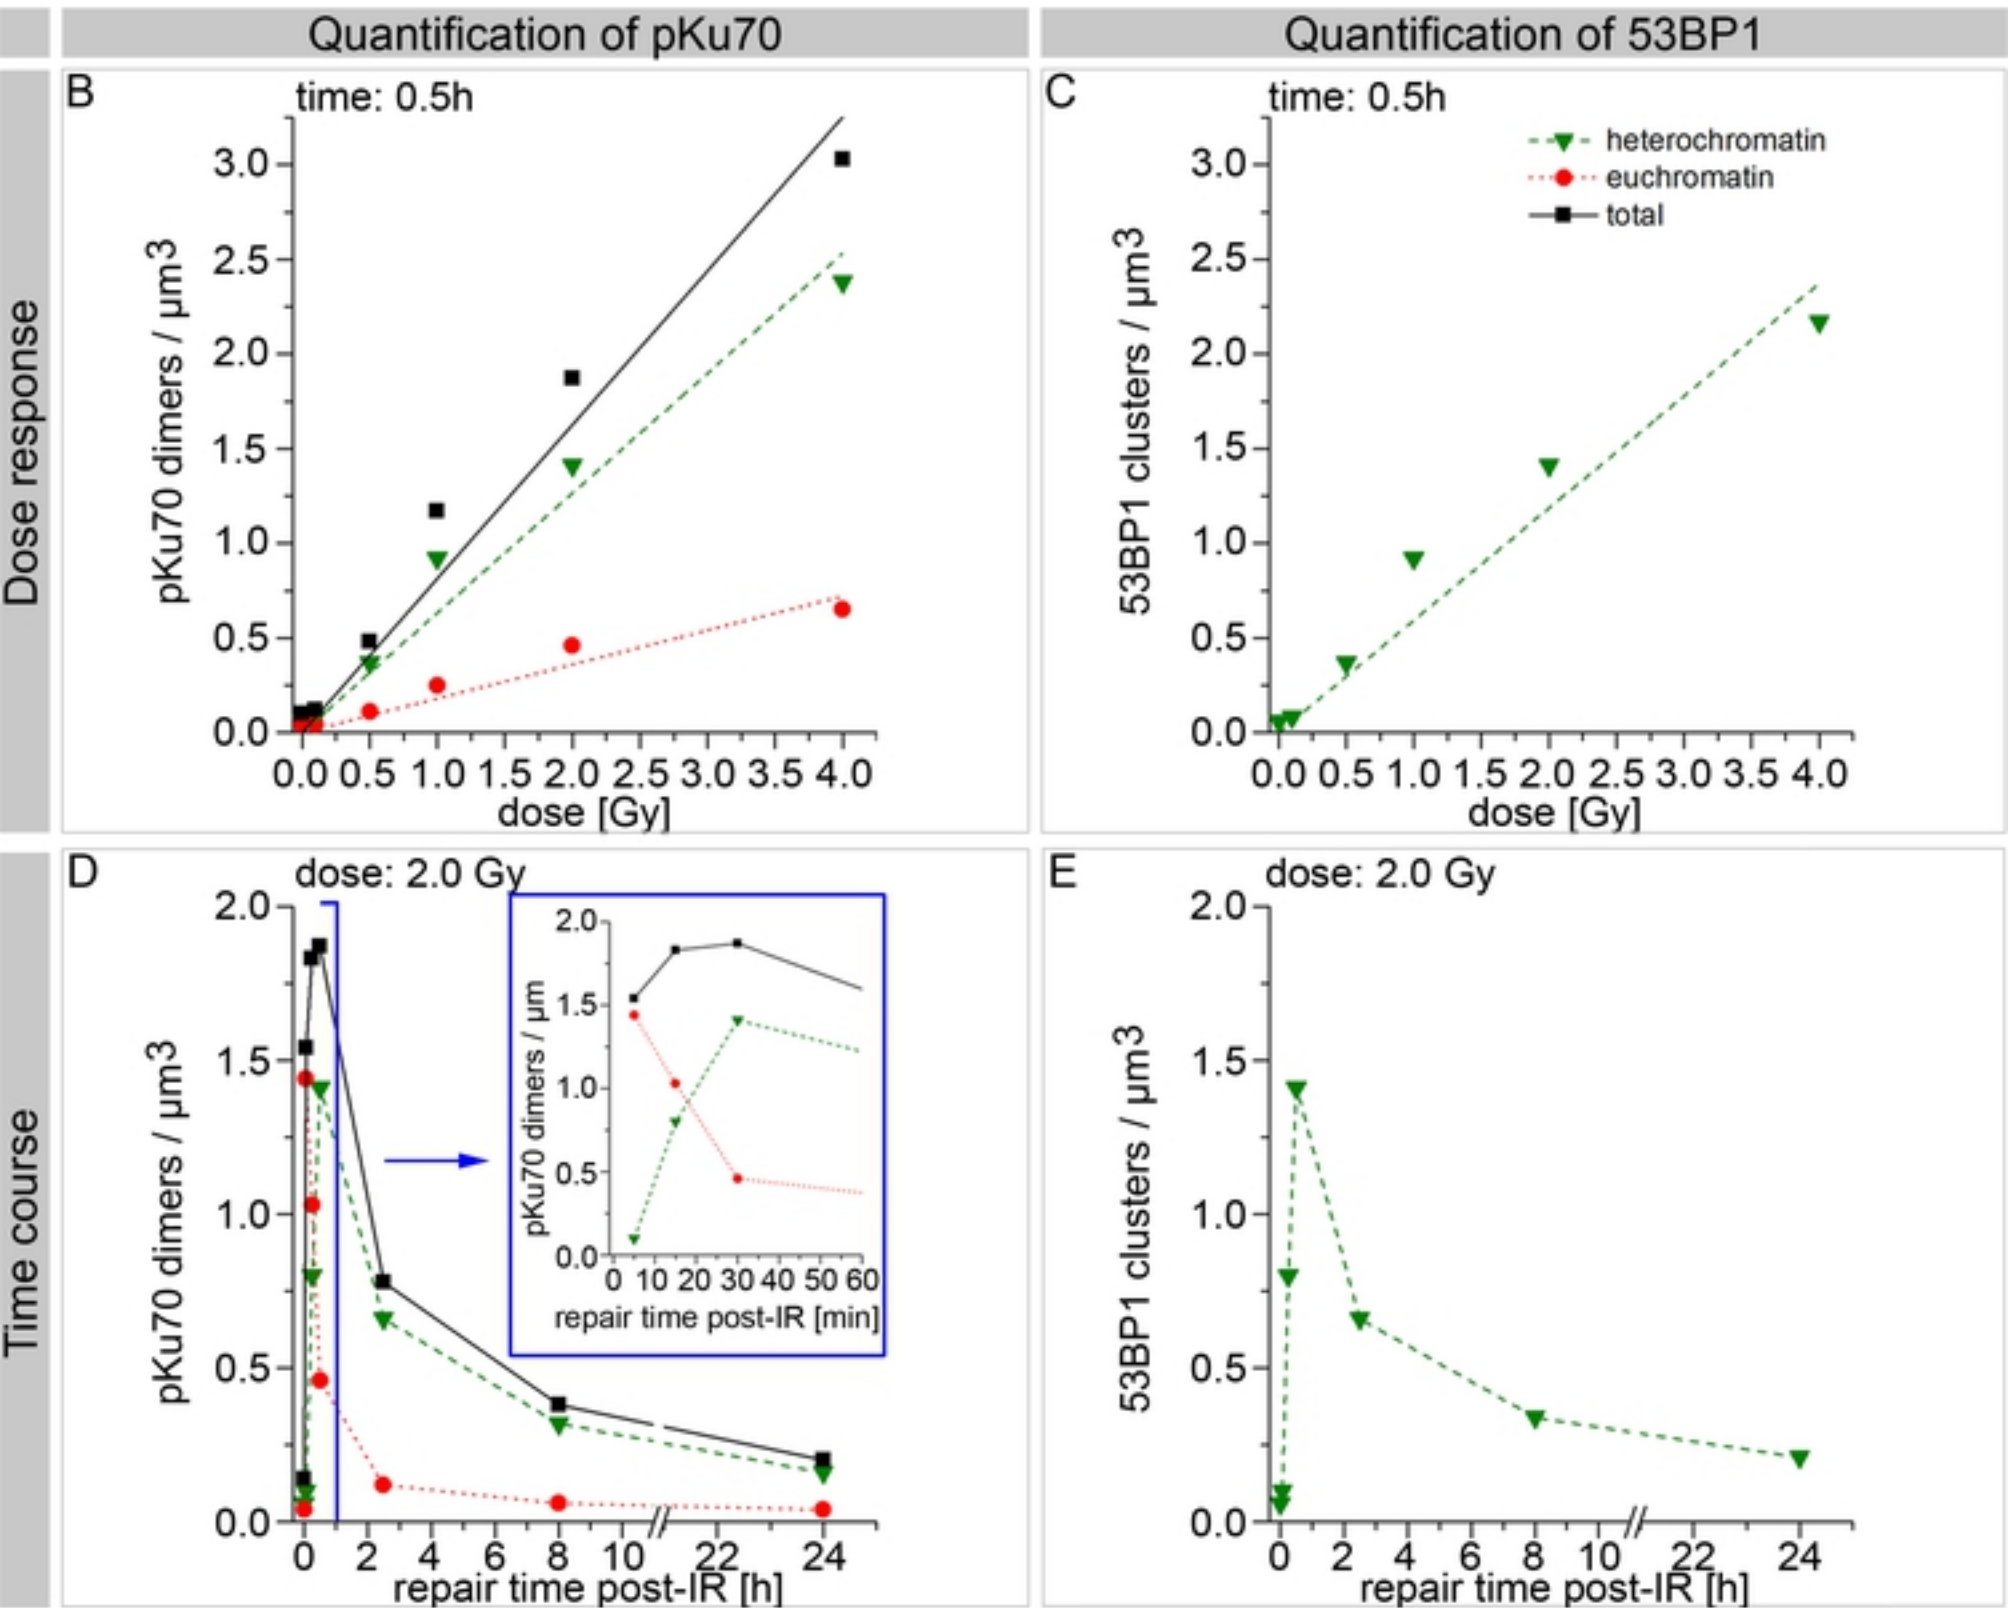

Fig 3



**A** TEM micrographs: pKu70 and 53BP1 in PBLs after RT

24h post-IR

pKu70/53BP1

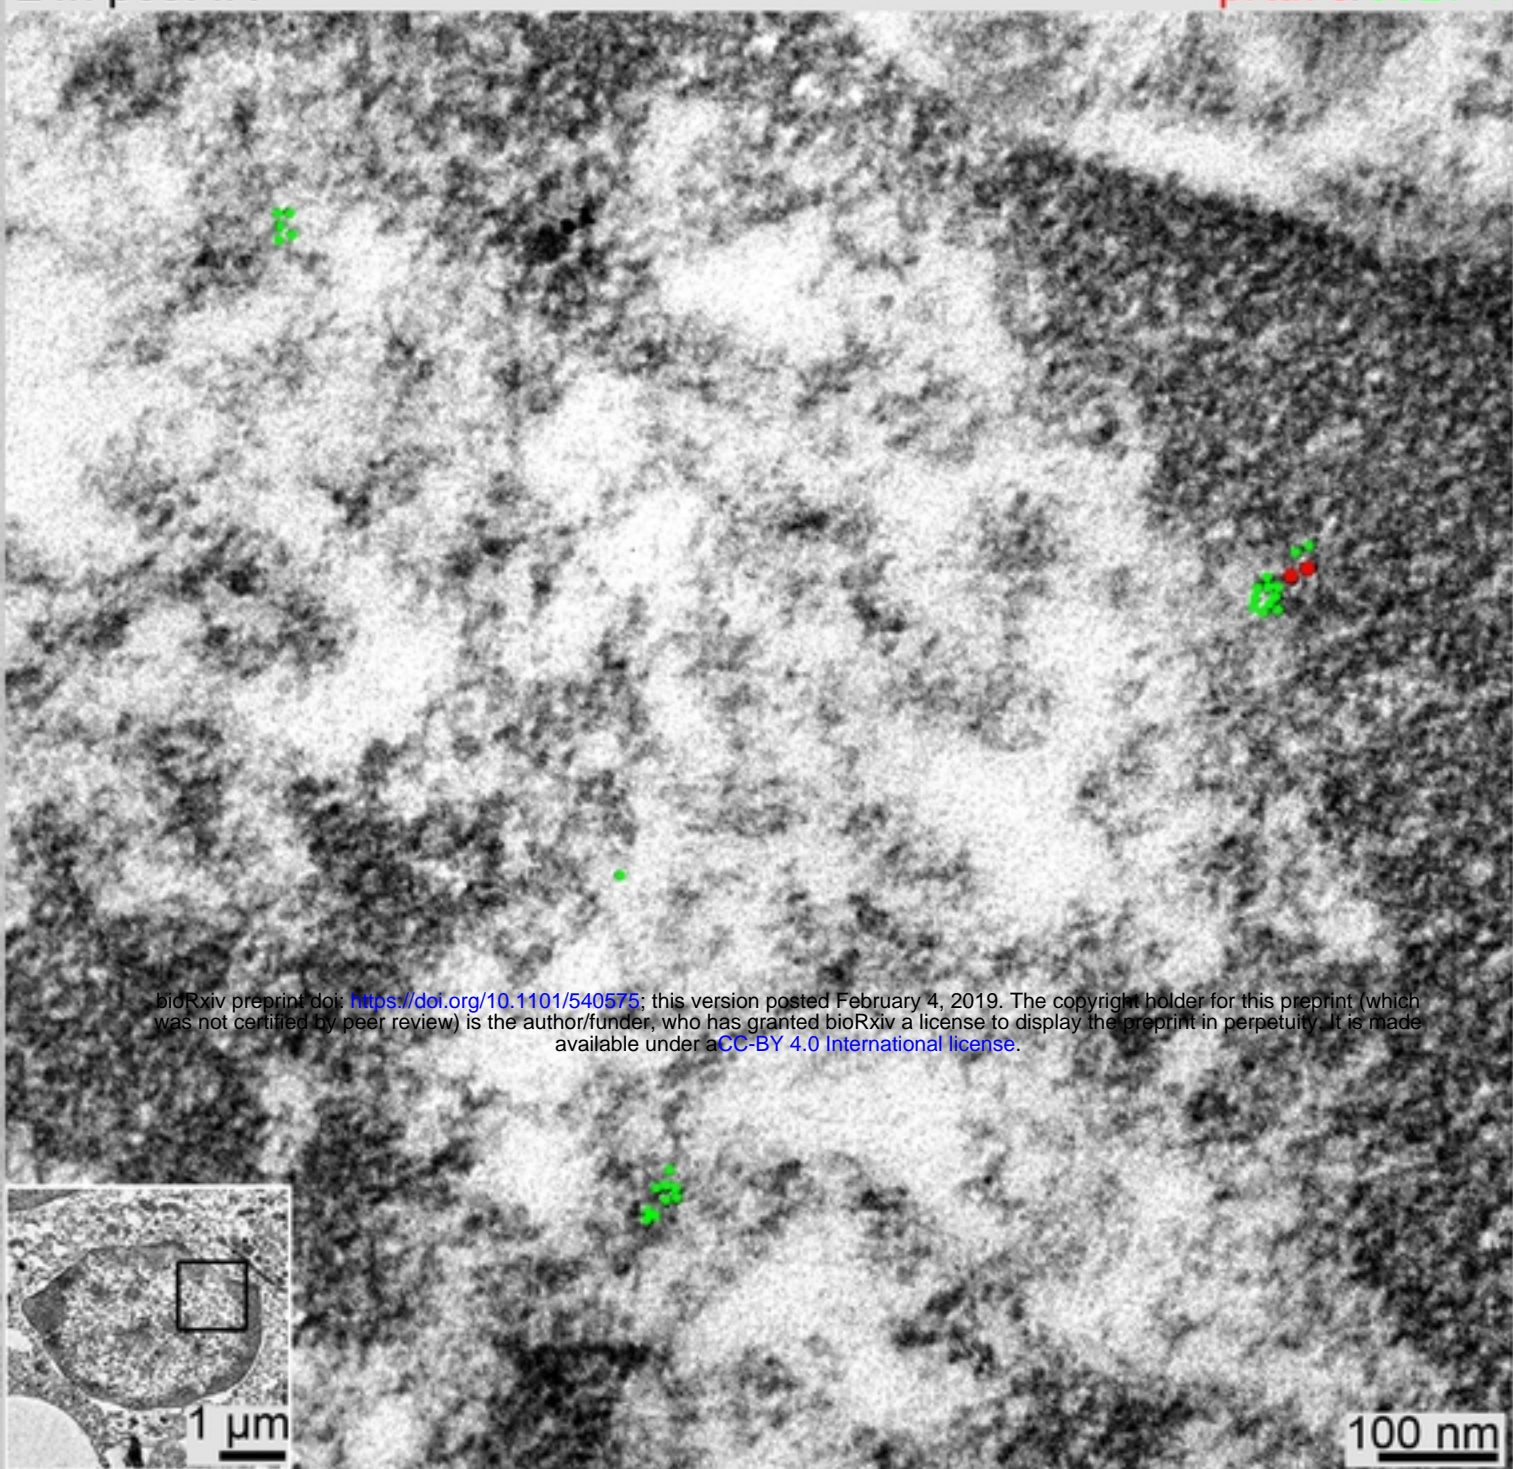

bioRxiv preprint doi: <https://doi.org/10.1101/540575>; this version posted February 4, 2019. The copyright holder for this preprint (which was not certified by peer review) is the author/funder, who has granted bioRxiv a license to display the preprint in perpetuity. It is made available under aCC-BY 4.0 International license.

**B** TEM micrographs: pKu70 and 53BP1 in PBLs after RCT

24h post-IR

pKu70/53BP1

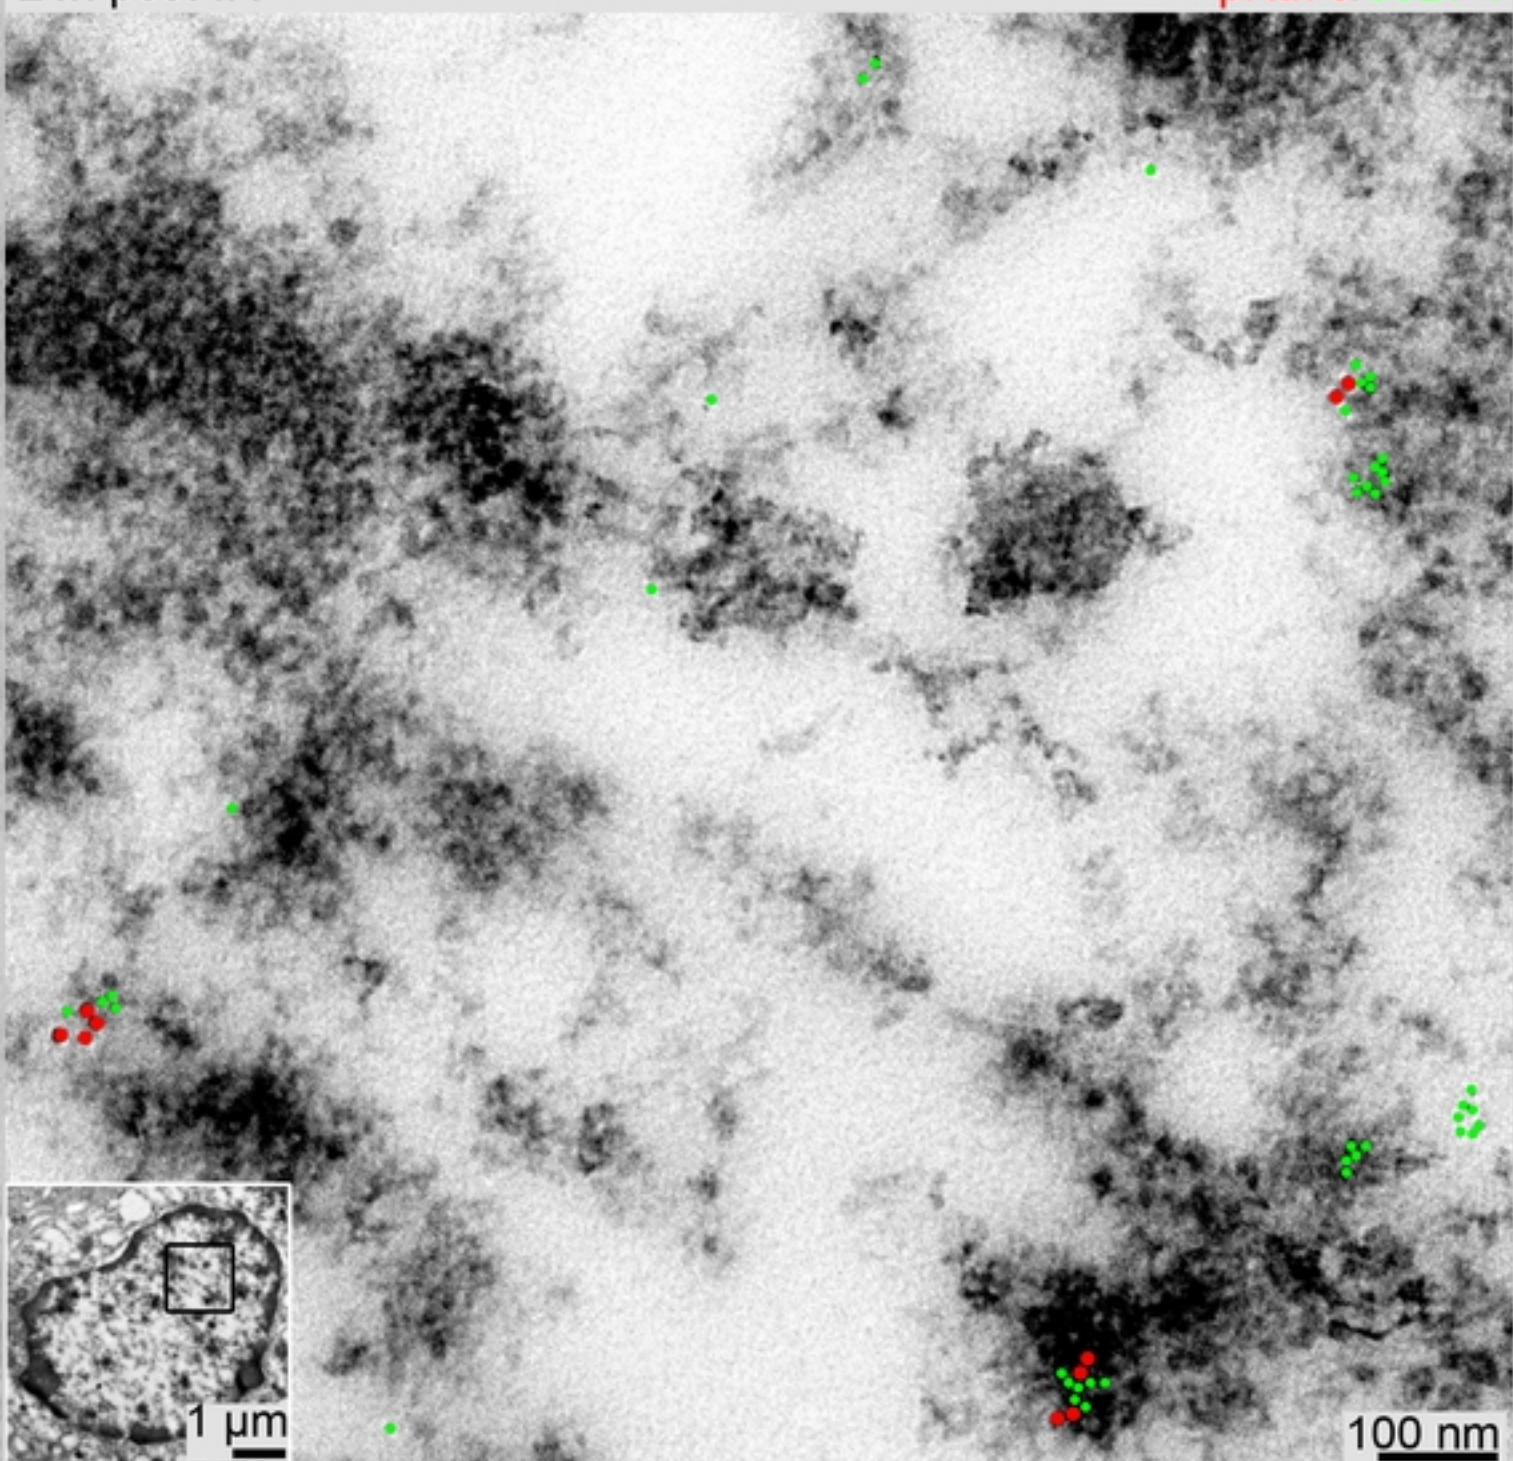

**C** Chromatin (total)

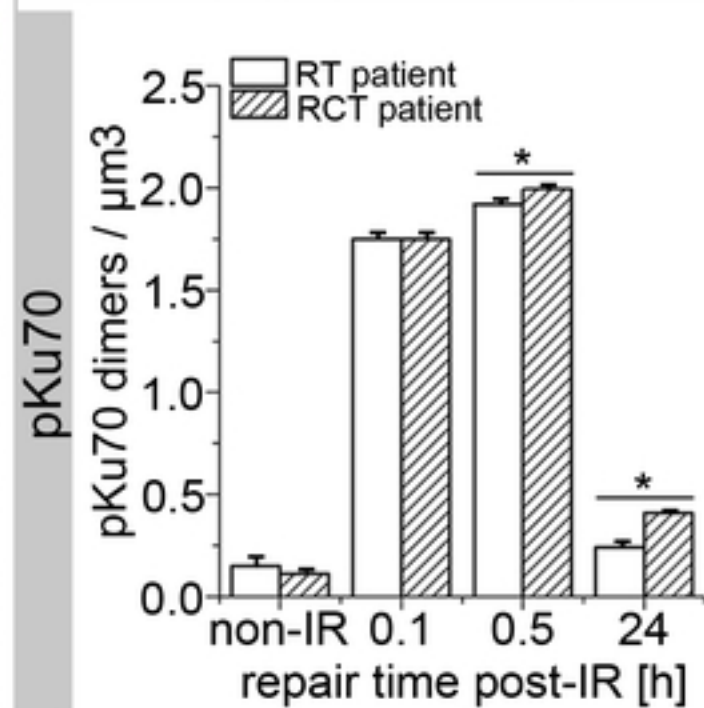

**D** Euchromatin

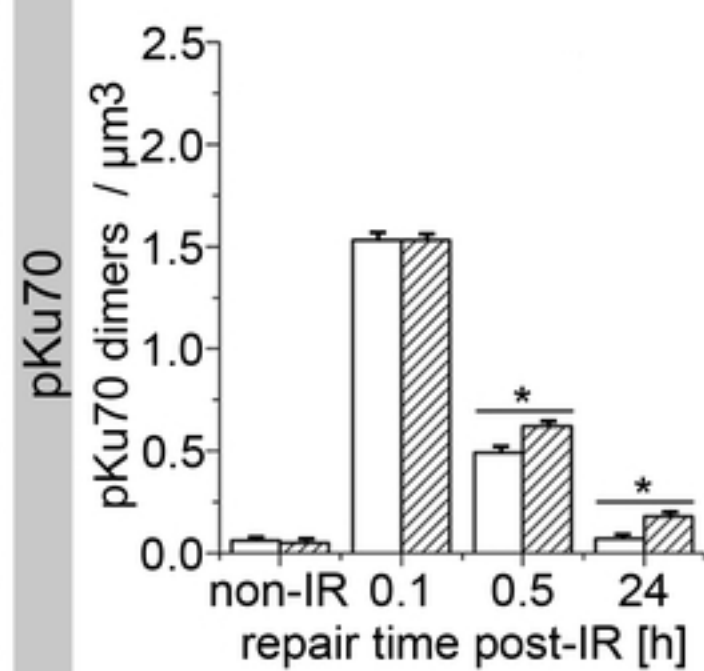

**E** Heterochromatin

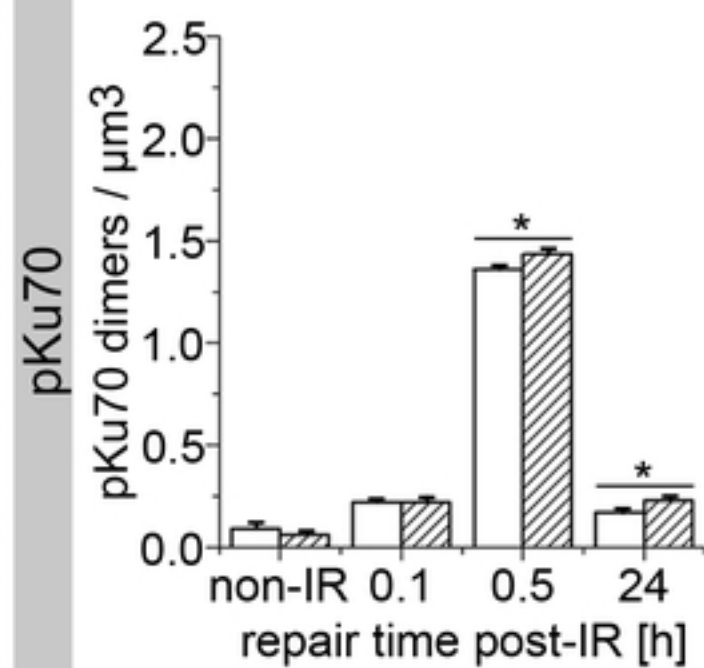

**F** Heterochromatin

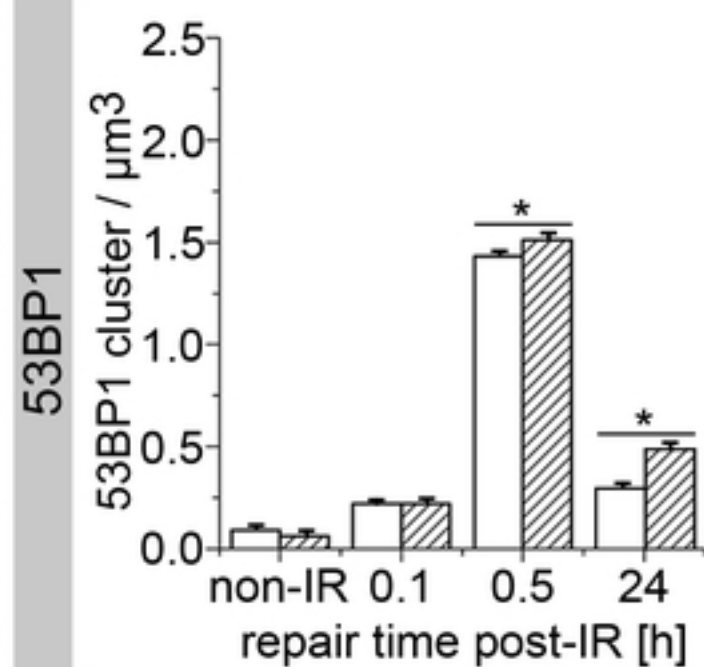

Fig 4
